1 **Three conserved hydrophobic residues in the CC domain of Pit contribute to its**  
2 **plasma membrane localization and immune induction**

3

4 **Qiong Wang<sup>1, 2, §</sup>, Yuying Li<sup>2, 3, §</sup>, Ken-ichi Kosami<sup>2, 4, §</sup>, Chaochao Liu<sup>5</sup>, Jing Li<sup>2, 6</sup>,**  
5 **Dan Zhang<sup>1</sup>, Daisuke Miki<sup>2</sup>, and Yoji Kawano<sup>2, 7, 8</sup>**

6

7 <sup>1</sup> School of Horticulture and Plant Protection, Yangzhou University, Yangzhou 225009,  
8 China

9 <sup>2</sup> CAS Center for Excellence in Molecular Plant Sciences, Shanghai Center for Plant  
10 Stress Biology, Chinese Academy of Sciences, Shanghai 201602, China

11 <sup>3</sup> Lingnan Guangdong Laboratory of Modern Agriculture, Genome Analysis Laboratory  
12 of the Ministry of Agriculture, Agricultural Genomics Institute at Shenzhen, Chinese  
13 Academy of Agricultural Sciences, Shenzhen 440307, China

14 <sup>4</sup> Fruit Tree Research Center, Ehime Research Institute of Agriculture, Forestry and  
15 Fisheries, Ehime 791-0112, Japan

16 <sup>5</sup> School of Biotechnology, Jiangsu University of Science and Technology, Zhenjiang  
17 212021, China

18 <sup>6</sup> University of Chinese Academy of Sciences, Beijing 100049, China

19 <sup>7</sup> Kihara Institute for Biological Research, Yokohama City University, Kanagawa 244-  
20 0813, Japan

21 <sup>8</sup> Institute of Plant Science and Resources, Okayama University, Okayama 710-0046,  
22 Japan

23

24 <sup>§</sup> These authors contributed equally to this work.

25

26 **Correspondence should be addressed to Yoji Kawano,**

27 Institute of Plant Science and Resources

28 Okayama University

29 2-20-1, Chuo, Kurashiki, Okayama 710-0046, Japan

30 Tel: +81-86-434-1242

31 E-mail: [yoji.kawano@okayama-u.ac.jp](mailto:yoji.kawano@okayama-u.ac.jp)

32

33 **Author emails:**

34 **Qiong Wang:** [wangqiong@yzu.edu.cn](mailto:wangqiong@yzu.edu.cn)

35 **Yuying Li:** [liyuying@caas.cn](mailto:liyuying@caas.cn)

36 **Ken-ichi Kosami:** [kenichi.kosami.1985@gmail.com](mailto:kenichi.kosami.1985@gmail.com)

37 **Chaochao Liu:** [qdliuchaohi@163.com](mailto:qdliuchaohi@163.com)

38 **Jing Li:** [jingli@psc.ac.cn](mailto:jingli@psc.ac.cn)

39 **Dan Zhang:** [MZ120201287@yzu.edu.cn](mailto:MZ120201287@yzu.edu.cn)

40 **Daisuke Miki:** [miki@sibs.ac.cn](mailto:miki@sibs.ac.cn)

41 **Yoji Kawano:** [yoji.kawano@okayama-u.ac.jp](mailto:yoji.kawano@okayama-u.ac.jp)

42 **ABSTRACT**

43 Nucleotide-binding leucine-rich repeat (NLR) proteins work as crucial intracellular  
44 immune receptors. N-terminal domains of NLRs fall into two groups, namely coiled-  
45 coil (CC) and Toll-interleukin 1 receptor (TIR) domains, which play critical roles in  
46 signal transduction and disease resistance. However, the activation mechanisms of  
47 NLRs, and how their N-termini are involved in immune induction, remain largely  
48 unknown. Here, we revealed that the rice NLR Pit self-associates through its CC  
49 domain. The CC domain of Pit possesses three conserved hydrophobic residues that are  
50 known to be involved in homodimer formation in two NLRs, barley MLA10 and  
51 Arabidopsis RPM1. Interestingly, the function of these residues in Pit is different from  
52 that in MLA10 and RPM1. Although the three hydrophobic residues are important for  
53 Pit-induced disease resistance against rice blast fungus, they do not participate in self-  
54 association or in binding to downstream signaling molecules. Based on homology  
55 modeling of Pit using the structure of the Arabidopsis NLR ZAR1, we tried to clarify  
56 the role of the three conserved hydrophobic residues and found that they are involved  
57 in the plasma membrane localization. Our findings provide novel insights for  
58 understanding the mechanisms of NLR activation as well as the relationship between  
59 subcellular localization and immune induction.

60

61

62 **Key words:** NLR protein; plasma membrane localization; self-association; effector-  
63 triggered immunity; rice

64

## 65 INTRODUCTION

66 Plants have developed two tiers in their immune system, called pattern-triggered  
67 immunity (PTI) and effector-triggered immunity (ETI), to detect invasion by various  
68 pathogens (Jones & Dangl, 2006; Dodds & Rathjen, 2010). The initiation of PTI  
69 depends on the successful perception of conserved pathogen-associated molecular  
70 patterns (PAMPs) by surface-localized pattern recognition receptors (PRRs) (Macho &  
71 Zipfel, 2014). Once PTI signaling is activated, it is usually accompanied by a series of  
72 immune responses, such as the production of reactive oxygen species (ROS), the  
73 expression of pathogenesis-related genes, and the synthesis of antimicrobial  
74 phytoalexins and the cell wall component lignin (Bigeard *et al.*, 2015). In general, PTI  
75 is sufficient to resist the attack of pathogens. Nevertheless, during evolution, pathogens  
76 have acquired the ability to secrete effectors into the apoplast or the plant cytoplasm to  
77 counteract the defense of PTI (Cui *et al.*, 2015; Jones *et al.*, 2016). To overcome this  
78 invasion, plants have co-evolved ETI as the second tier of the immune system. The  
79 majority of genetically characterized disease resistance traits in plants map to genes  
80 encoding nucleotide-binding domain and leucine-rich repeat proteins (NLRs). These  
81 act as receptors to surveil effectors derived from pathogens and to activate ETI, which  
82 includes the hypersensitive response (HR) and ROS production. NLRs share two core  
83 domains: a central nucleotide-binding (NB-ARC) domain and a C-terminal leucine-rich  
84 repeat (LRR) domain (Cui *et al.*, 2015). The NB-ARC domain is thought to serve as a  
85 switch domain in NLRs by controlling nucleotide exchange and hydrolysis, and this  
86 nucleotide exchange leads to conformational change and oligomerization of NLRs,  
87 resulting in the triggering of ETI (Takken *et al.*, 2006; Maekawa *et al.*, 2011a). Highly  
88 variable LRR domains define at least part of the recognition specificity of NLRs to  
89 pathogen effector proteins. The N-terminus of NLRs is categorized into two domains,  
90 namely a Toll/interleukin-1 receptor (TIR) domain and a coiled-coil (CC) domain, and  
91 therefore NLRs are subclassified into TIR-NLRs (TNLs) and CC-NLRs (CNLs).  
92 Previous studies have demonstrated that in several NLRs, overexpression of the CC or  
93 TIR domain alone has autoactivity to induce cell death, implying that N-terminal CC  
94 and TIR domains are important platforms to trigger immune responses (Swiderski *et*

95 *al.*, 2009; Bernoux *et al.*, 2011; Collier *et al.*, 2011; Maekawa *et al.*, 2011a; Wang *et al.*,  
96 *al.*, 2015). N-terminal CC and TIR domains are now known to play key roles in several  
97 functions, including indirect surveillance of pathogen effectors and binding of  
98 downstream signaling molecules (Cui *et al.*, 2015; Jones *et al.*, 2016; Kourelis & van  
99 der Hoorn, 2018).

100 Moreover, self (homomers) and non-self (heteromers) oligomerization of N-  
101 terminal NLRs are indispensable to trigger ETI (Maekawa *et al.*, 2011a; Williams *et al.*,  
102 2014; Wang *et al.*, 2019a). Structural studies have revealed that TIR domains exhibit a  
103 flavodoxin-like fold consisting of five  $\alpha$ -helices surrounding a five-strand  $\beta$ -sheet, and  
104 at least two different oligomerization interfaces exist among the TIR domains  
105 (Chakraborty & Ghosh, 2020). The flax TNL L6 possesses the  $\alpha$ D and  $\alpha$ E helices (the  
106 DE interface) (Bernoux *et al.*, 2011), and a pair of Arabidopsis TNLs, RPS4 and  
107 RRS1, have  $\alpha$ A and  $\alpha$ E helices (the AE interface) (Williams *et al.*, 2014). Interestingly,  
108 the Arabidopsis TNLs SNC1 and RPP1 have the DE/AE or DE/AE-like interaction  
109 interfaces (Zhang *et al.*, 2017; Chakraborty & Ghosh, 2020). Recently, two cryo-  
110 electron microscopy (EM) structures of TNLs, *Nicotiana benthamiana* ROQ1 and  
111 Arabidopsis RPP1, were solved and they revealed that direct bindings of both TNLs  
112 to the corresponding effectors induce TNLs to form tetrameric resistosomes for immune  
113 signaling (Ma *et al.*, 2020; Martin *et al.*, 2020). The TIR domains of them bind to each  
114 other via two distinct interfaces, AE and BE (equivalent to the BB-loop of other TIR  
115 domains). While the first structure of the CC domain of CNL was revealed as an  
116 antiparallel homodimer of barley MLA10 in crystals (Maekawa *et al.*, 2011b).  
117 Subsequent studies have proved the CC domains of all the other NLRs including wheat  
118 Sr33 and potato Rx behave monomeric proteins with a four-helix bundle conformation  
119 (Hao *et al.*, 2013; Casey *et al.*, 2016). Recently, using a cryo-EM, Wang *et al.* revealed  
120 the full length structures of the Arabidopsis CNL ZAR1 in monomeric inactive and  
121 transition states as well as the active pentameric ZAR1 resistosome (Wang *et al.*, 2019a).  
122 The CC domain of ZAR1 also displays a four-helix bundle conformation. A large  
123 portion of the helix  $\alpha$ 1 (residues 12–44) of the MLA10 CC domain appears to be an  
124 important interface for homodimerization. Single mutations in three hydrophobic

125 residues (I33, L36, and M43) of the helix  $\alpha 1$  in MLA10 dramatically decreased self-  
126 association as well as binding activity to a downstream signaling molecule, HvWRKY1,  
127 resulting in compromised resistance to the pathogenic powdery mildew fungus. The  
128 hydrophobicity of these residues is conserved among various CNLs including  
129 Arabidopsis RPM1. Triple mutation of the corresponding three hydrophobic residues  
130 in RPM1 also leads to a loss of self-association and immune induction activity (El  
131 Kasmi *et al.*, 2017). All of the single mutants in three hydrophobic residues show  
132 reduced interaction with the small host protein RIN4 (El Kasmi *et al.*, 2017). It is  
133 unclear whether these residues are universally involved in self-association or whether  
134 their functions differ in each NLR.

135 Evidence has been accumulating that the subcellular distribution of NLRs is  
136 important for their functions. Perception of the fungal effector A10 by MLA10 triggers  
137 the nuclear translocation from the cytosol, resulting in interaction between MLA10 and  
138 HvWRKY1 in the nucleus to induce defense responses (Shen *et al.*, 2007). The  
139 intranuclear activities of the Arabidopsis TNL RPS4 restrict bacterial growth and  
140 programmed cell death, and nucleocytoplasmic coordination of RPS4 needs  
141 transcriptional resistance reinforcement (Heidrich *et al.*, 2011). The potato CNL Rx1 is  
142 located in both the cytoplasm and the nucleus, and the appropriate nucleocytoplasmic  
143 distribution of Rx1 is required for full functionality (Slootweg *et al.*, 2010; Tameling  
144 *et al.*, 2010). Rx1 activation triggered by effector recognition occurs only in the  
145 cytoplasm. The CC domain and the cochaperone SGT contribute to nuclear localization  
146 of Rx1, but the LRR domain is associated with cytoplasmic localization.  
147 The Arabidopsis CNL RPM1 requires plasma membrane distribution while the potato  
148 CNL R3a needs endomembrane localization, and disrupting the proper localization of  
149 both NLRs impairs their functions (Gao *et al.*, 2011; Engelhardt *et al.*, 2012). The  
150 oligomerization-induced active Arabidopsis ZAR1 complex associates with the plasma  
151 membrane (Wang *et al.*, 2019a). Although our knowledge of NLR protein localization  
152 has increased in recent years, it is not yet sufficient to understand the mechanisms and  
153 significance of the dynamic nature of NLR protein localization or the relationship  
154 between subcellular localization and activation states.

155 We have previously revealed that the small GTPase OsRac1 functions as a  
156 molecular switch in rice and plays key roles in both PTI and ETI (Kawano *et al.*, 2010;  
157 Akamatsu *et al.*, 2013; Kawano & Shimamoto, 2013; Kawano *et al.*, 2014b). OsRac1  
158 forms immune protein complex(es) directly or indirectly with 16 binding partners such  
159 as NADPH oxidase and OsMPK6, thereby leading to the induction of immune  
160 responses (Lieberherr *et al.*, 2005; Chen *et al.*, 2010; Akamatsu *et al.*, 2013; Kawano  
161 & Shimamoto, 2013; Kawano *et al.*, 2014b; Kosami *et al.*, 2014). OsRac1 acts as a  
162 downstream switch molecule for three CNLs, Pit, Pia, and PID3, which all confer  
163 resistance to *Magnaporthe oryzae*, implying that OsRac1 is a key signaling switch for  
164 rice CNLs (Ono *et al.*, 2001; Kawano *et al.*, 2010; Wang *et al.*, 2018; Zhou *et al.*, 2019).  
165 Recently, we clarified how the CNL Pit activates OsRac1. Pit interacts directly with the  
166 GDP/GTP exchanger (GEF) protein OsSPK1, which is an activator for OsRac1,  
167 through its CC domain (Wang *et al.*, 2018) and also associates with OsRac1 through its  
168 NB-ARC domain (Kawano *et al.*, 2010). Both Pit and OsRac1 seem to be  
169 posttranslationally modified by a lipid modification, palmitoylation, and these three  
170 proteins may form a ternary complex at the plasma membrane to trigger ETI (Ono *et*  
171 *al.*, 2001; Kawano *et al.*, 2014a; Yalovsky, 2015; Wang *et al.*, 2018).

172 In this study, we clarified the role of the above-mentioned three conserved  
173 hydrophobic residues in the CC domain of Pit. Interestingly, the three residues are  
174 involved in the plasma membrane localization of Pit, and are indispensable for Pit-  
175 mediated disease resistance to rice blast fungus, but do not participate in self-  
176 association and binding to its direct signaling molecules OsSPK1 and OsRac1.  
177 Collectively, our results shed light on how NLRs trigger immune induction.

178

## 179 RESULTS

### 180 Pit self-associates through its CC domain

181 Since several CNL and TNL proteins have been reported to self-associate (Mestre &  
182 Baulcombe, 2006; Ade *et al.*, 2007), we tested whether the rice NLR Pit forms homo-  
183 oligomers *in planta*. We transiently co-expressed full-length Pit WT-HA and Pit WT-  
184 Myc in *Nicotiana benthamiana* and performed a co-immunoprecipitation (co-IP) assay.  
185 When Pit WT-HA was precipitated with anti-HA antibody, Pit WT-Myc co-  
186 precipitated but a control GUS-HA did not, indicating that Pit self-associates  
187 *in planta* (Figure 1A). Previous studies have demonstrated that the N-terminal CC and  
188 TIR domains are important interfaces for homo-oligomerization in NLRs, and that these  
189 interactions are indispensable for NLR functions (Maekawa *et al.*, 2011a; Williams *et*  
190 *al.*, 2014). Next, we examined whether Pit self-associates through its CC domain  
191 (amino acids 1-140). By using a yeast two-hybrid assay, we found that the CC domain  
192 of Pit formed homomers (Figure 1B). Consistent with this observation, self-association  
193 between the CC domains of Pit was observed in a co-IP assay in *N. benthamiana*  
194 (Figure 1C) and an *in vitro* binding assay (Figure 1D). Taken together, these results  
195 indicate that Pit forms homomers through its CC domain.

196

### 197 Three conserved residues do not contribute to self-association of Pit

198 Although the primary sequences of the N-terminal CC domain of NLRs are dissimilar,  
199 three hydrophobic residues (I33, L36, and M43) of the helix  $\alpha 1$  in MLA10 are highly  
200 conserved among the known CNL proteins including Pit (Maekawa *et al.*, 2011a)  
201 (Figure 2A). In MLA10 and RPM1, these three residues are involved in self-association  
202 and are indispensable for immune induction (Maekawa *et al.*, 2011b; El Kasmi *et al.*,  
203 2017). I33, L36, and M43 in MLA10 correspond to I34, L37, and L41 in Pit. Our  
204 finding that Pit forms homomers through its CC domain raised the possibility that the  
205 three conserved hydrophobic residues of Pit also participate in oligomerization and are  
206 essential for its function. To test this hypothesis, we built a homology model of the CC  
207 domain of Pit using the crystal structure of the CC domain of MLA10 (Maekawa *et al.*,  
208 2011a). Similar to MLA10, the model structure of the CC domain of Pit dimerized



209 through the helix  $\alpha 1$  using three hydrophobic residues of I34, L37, and L41 (Figure  
210 2B). We generated CC domain Pit mutants in which these three conserved residues  
211 were converted to negatively charged glutamic acid, and tested whether they are  
212 involved in self-association. Interestingly, both the single mutations (Pit I34, L37, or  
213 L41) and the triple mutation of Pit (Pit 3E: Pit I34E L37E L41E) retained self-  
214 association ability in an *in vitro* binding assay (Figure 2C), and a consistent result was  
215 obtained in a yeast two-hybrid assay (Figures 2D and S1A). We also conducted a co-  
216 IP assay in *N. benthamiana* using full-length Pit but could not observe a visible effect  
217 on self-association (Figure 2E). Overall, these results indicate that the three  
218 hydrophobic residues do not contribute to self-association of Pit.

219

### 220 **Mutations in the three conserved residues of Pit compromise Pit-mediated** 221 **immune responses**

222 Next, we examined whether the effects of the hydrophobic residue mutants of Pit  
223 influenced immune responses. We have previously generated a constitutively active  
224 form of Pit, named Pit D485V. Pit D485V is a MHD motif mutant that is able to induce  
225 cell death and ROS production in *N. Benthamiana*, probably through the employment  
226 of tobacco orthologs of OsRac1 and OsSPK1 as downstream signal transducers because  
227 the overexpression of the dominant negative form of OsRac1 suppresses Pit D485V-  
228 induced cell death in *N. Benthamiana* (Kawano *et al.*, 2010; Kawano *et al.*, 2014b). The  
229 single mutations and the triple mutation in the three hydrophobic residues clearly  
230 attenuated Pit D485V-induced cell death (Figures 3A and S1C) and ROS production  
231 (Figures 3B, S1B and S1C). We also employed two rice systems to evaluate the Pit  
232 mutants. We used a luciferase reporter system to monitor the effect of the Pit mutants on  
233 cell death in rice protoplasts. In this system, we transfected the *Pit* mutants with a  
234 *luciferase* vector into rice protoplasts and measured the viability of protoplasts based  
235 on luminescence. We found that the luciferase activity in cells expressing Pit WT was  
236 significantly lower than that in cells expressing control GUS, indicating that Pit WT is  
237 autoactive and induces cell death in rice protoplasts (Figure 3C). This Pit WT-induced  
238 cell death was abolished by the introduction of the mutations in three conserved

239 hydrophobic residues (Figures 3C and S1D). Next, we tested the effect of the  
240 hydrophobic residue mutants of Pit on disease resistance to rice blast fungus. In this  
241 experiment, we generated transgenic plants of the susceptible rice cultivar Nipponbare  
242 carrying the exogenous *Pit* resistance genes (Figure S2A), and chose the avirulent rice  
243 blast fungus *M. oryzae* race 007.0, because Pit-dependent disease resistance has been  
244 established between *Pit* and *M. oryzae* race 007.0 (Hayashi *et al.*, 2010). Therefore,  
245 Nipponbare is a suitable cultivar to assess transgenes encoding the *Pit* mutants.  
246 Nipponbare expressing *Pit* WT displayed shorter lesions induced by *M. oryzae* than did  
247 Nipponbare, but this effect was compromised in both single and triple mutants for the  
248 three hydrophobic residues (Figures 3D and 3E). We also precisely quantified fungal  
249 invasion by measuring the amount of fungal DNA using real-time PCR (Figure 3F).  
250 The result of this qPCR was consistent with that of the lesion length comparison,  
251 showing that mutation of the three hydrophobic residues perturbed Pit-triggered  
252 resistance to avirulent rice blast fungus. Take together, these data indicate that the three  
253 hydrophobic residues in the CC domain of Pit are indispensable for Pit-mediated  
254 immune responses.

255

### 256 **Mutations in the three conserved hydrophobic residues abolish Pit-induced** 257 **OsRac1 activation but do not affect the interaction with OsRac1 and OsSPK1**

258 Since the three hydrophobic residue mutations of Pit significantly perturbed Pit-  
259 mediated immune responses (Figure 3), we checked the interactions between Pit and its  
260 two downstream signaling molecules: the molecular switch of rice immunity OsRac1  
261 and its activator OsSPK1. Pit may form a ternary complex with OsSPK1 and OsRac1  
262 at the plasma membrane and activates OsRac1 through OsSPK1 to induce Pit-mediated  
263 immunity (Kawano *et al.*, 2010; Wang *et al.*, 2018). We previously mapped the binding  
264 region of OsSKP1 in Pit and revealed that a proline-rich motif of the CC domain in Pit  
265 (residues 91–95) is required for its binding to OsSPK1 (Wang *et al.*, 2018). Consistent  
266 with that finding, there is no visible effect in any of the three hydrophobic residue  
267 mutants of Pit on binding to OsSPK1 in a co-IP assay in *N. benthamiana* using the CC  
268 domain (Figure 4A) and an *in vitro* binding assay (Figure S2B) and the full-length

269 polypeptide (Figure S2C) of Pit. Moreover, mutating the three hydrophobic residues of  
270 Pit did not change its binding activity to OsRac1, probably because OsRac1 binds to  
271 the NB-ARC domain of Pit (Figure 4B) (Kawano *et al.*, 2010). Next, we checked  
272 OsRac1 activation by the Pit mutants using a Förster resonance energy transfer (FRET)  
273 sensor called Ras and interacting protein chimeric unit (Raichu)-OsRac1 (Wong *et al.*,  
274 2018). In this sensor, intramolecular binding of the active GTP-OsRac1 to CRIB brings  
275 CFP closer to Venus, enabling FRET from CFP to Venus when OsRac1 is activated  
276 (Wong *et al.*, 2018). The resulting Venus fluorescence represents the activation state of  
277 OsRac1 *in vivo*: low and high ratios of Venus/CFP fluorescence correspond to low and  
278 high levels of OsRac1 activation, respectively. The ratio of Venus/CFP fluorescence of  
279 Raichu-OsRac1 in rice protoplasts expressing Pit D485V was much higher than that in  
280 protoplasts expressing a control GUS, indicating that Pit D485V activates OsRac1 in  
281 rice protoplasts, but the triple mutant Pit 3E with the D485V mutation failed to trigger  
282 this activity (Figures 4C and 4D). Thus, we conclude that Pit 3E retains binding activity  
283 to OsSPK1 and OsRac1 but loses the ability of wild-type Pit to trigger OsRac1  
284 activation.

285

### 286 **Homology modeling of Pit**

287 From the results of our interaction studies in Figure 2, it appears that the MLA10  
288 structure is not applicable to Pit. The structures of the CC domain of NLRs resolve into  
289 two types: MLA10 forms dimers and shows a helix–loop–helix structure (Maekawa *et al.*  
290 *et al.*, 2011a), while Sr33 and Rx display a distinct structure that exhibits a four-helix  
291 bundle (Hao *et al.*, 2013; Casey *et al.*, 2016). Recently, Wang *et al.* solved the structure  
292 of the inactive and active states of the full-length CNL ZAR1, which revealed that the  
293 N-terminal CC domain of inactivated ZAR1 (PDB code 6J5W, Chain A, 1–113)  
294 possesses a four-helix bundle, like Sr33 (PDB code 2NCG) and Rx (PDB code 4M70,  
295 Chain A) (Figure 5A), implying that Pit also displays the four-helix bundle (Hao *et al.*,  
296 2013; Casey *et al.*, 2016; Wang *et al.*, 2019b). To test this hypothesis and understand  
297 the function of I34, L37, and L41 in Pit, we undertook detailed homology structure  
298 modeling of Pit based on the inactive (ADP-bound) and active (dATP-bound) structures

299 of the NLR ZAR1 (Wang *et al.*, 2019a; Wang *et al.*, 2019b). The model structure of the  
300 CC domain of Pit displays a four-helix bundle, and the three hydrophobic residues are  
301 buried inside the CC domain (Figure 5B). These residues locate on  $\alpha$ -helix 2 ( $\alpha$ 2) and  
302 make hydrophobic contact with  $\alpha$ -helix1 ( $\alpha$ 1) and  $\alpha$ -helix 3 ( $\alpha$ 3), which may enhance  
303 the stability of the four-helix bundle. The three hydrophobic residues are conserved in  
304 Sr33 (I33, L36, and L40), Rx (L24, F27, and L31), and ZAR1 (L31, L34, and L38), and  
305 they also form similar hydrophobic contacts (Casey *et al.*, 2016; El Kasmi *et al.*, 2017)  
306 (Figure 5B). In the model structure of the inactive form of Pit, the LRR domain  
307 sequesters Pit in a monomeric state (Figure 5C). The CC domain of Pit contacts the  
308 helical domain (HD1) and a winged-helix domain (WHD) in the NB-ARC domain, and  
309 these interactions may keep the CC domain inactive (Burdett *et al.*, 2019; Wang *et al.*,  
310 2019b).

311 ZAR1 transitions from a monomeric inactive form to the active form, a wheel-like  
312 pentameric resistosome, during immune activation (Wang *et al.*, 2019a; Wang *et al.*,  
313 2019b). Since Pit forms homomers (Figure 1), we also generated a model structure of  
314 Pit with reference to the structure of the active form of ZAR1 (Wang *et al.*, 2019a).  
315 Superposition of the inactive Pit model structure with one protomer of the active Pit  
316 model structure revealed that the conformational change between the active and  
317 inactive forms of Pit probably occurs at two regions: around the hinge linking the HD  
318 and WHD domains, and in the  $\alpha$ 1 helix of the CC domain (Figure 6A). In the inactive  
319 Pit model structure, the amphipathic  $\alpha$ 1 helix is buried in the four-helix bundle and  
320 interacts with the WHD and LRR domains. In the active Pit model structure, the  $\alpha$ 1  
321 helix rotates and separates from the four-helix bundle, becoming a fully solvent-  
322 exposed  $\alpha$ 1 helix (Burdett *et al.*, 2019). In the active-form Pit model structure, Pit forms  
323 a wheel-like pentamer and all the subdomains of Pit are involved in this oligomerization  
324 (Figure 6B). The formation of an  $\alpha$ -helical funnel-shaped structure in the CC domain  
325 contributes to the oligomerization of Pit and is consistent with the self-association of  
326 Pit through its CC domain (Figures 1 and 6B) (Wang *et al.*, 2019a). In the active Pit  
327 model structure, I34, L37, and L41 locate on the  $\alpha$ 2 helix and are buried inside the CC  
328 domain, implying that they do not contribute to self-association of the CC domain. This

329 model structure fits well with the result of our binding assays (Figure 2). Interestingly,  
330 the three conserved hydrophobic residues make hydrophobic contacts with V75, I78,  
331 and V79 of the  $\alpha 3$  helix, which itself forms hydrophobic interactions with isoleucines  
332 I500 and L510 in the WHD domain (Figure 6C). The introduction of negatively charged  
333 glutamic acid into I34, L37, and L41 of Pit may decrease the molecular packing density  
334 between  $\alpha 2$  and  $\alpha 3$  helices in the CC domain, leading to a weakening of the hydrophobic  
335 interactions among the  $\alpha 2$  and  $\alpha 3$  helices of the CC domain, and the WHD  
336 domain. Besides, D77 in the  $\alpha 3$  helix also forms a hydrogen bond with K532 in the  
337 LRR domain. These interactions appear to provide a foundation when the activated  
338 protein oligomerizes via its CC domain to form a functional funnel-shaped structure.  
339 We checked whether ZAR1 has these interactions between the CC, WHD, and LRR  
340 domains in the active ZAR1 structure, and found that L31 and L34 of the  $\alpha 2$  helix make  
341 hydrophobic contacts with I75 and L76 of the  $\alpha 3$  helix, and L115 and I118 of the  $\alpha 4$   
342 helix (Figure 6D). Moreover, hydrogen bonds were predicted to between the  $\alpha 2$  helix  
343 and WHD (K46 and S413) and between the  $\alpha 3$  helix and the LRR domain (E67 and  
344 R513, E73 and R533). These structural features of ZAR1 are similar to those of Pit  
345 modeling.

346

### 347 **Mutations in the three hydrophobic residues of Pit perturb its plasma membrane** 348 **localization**

349 Next, we checked the localization of the hydrophobic residue mutants of Pit in rice  
350 protoplasts. We had previously demonstrated that Pit WT is localized at the plasma  
351 membrane, but we now found that introducing single mutations into the three  
352 hydrophobic residues compromised Pit's plasma membrane localization (Figure 7A)  
353 (Kawano *et al.*, 2010; Kawano *et al.*, 2014a). We further investigated the localization  
354 of the hydrophobic residue mutants in *N. benthamiana* and found that Pit WT was well  
355 merged with FM4-64, a plasma membrane marker, confirming that Pit WT is localized  
356 in the plasma membrane (Figure 7B); in contrast, plasma membrane localization was  
357 disrupted in all of the hydrophobic residue mutants. Taken together, these results

358 indicate that the three conserved hydrophobic residues of Pit are required for its proper  
359 plasma membrane localization.

360 We checked the OsSPK1-binding activity of these Pit mutants by bimolecular  
361 fluorescence complementation (BiFC) assay in *N. benthamiana*. Consistent with the  
362 results of the binding assays (Figure 4A and 4B), OsSPK1 binding was comparable in  
363 the mutants to that in Pit WT (Figure 7C). However, the localization of the Pit–OsSPK1  
364 complex differed between Pit WT and the hydrophobic mutants. Pit WT interacted with  
365 OsSPK1 at the plasma membrane, as reported previously (Figure 7C) (Wang *et al.*,  
366 2018), but a large proportion of the complexes between OsSPK1 and the Pit mutants  
367 was mislocalized away from the plasma membrane. Finally, we examined complex  
368 formation between OsRac1 and the Pit mutants by a BiFC assay and found that the Pit  
369 WT-OsRac1 complex was situated at the plasma membrane. Interestingly, none of the  
370 mutations in the hydrophobic residues disrupted the Pit-OsRac1 interaction at the  
371 plasma membrane (Figure 7D), probably because OsRac1 is anchored there by its lipid  
372 modification. Taken together, these results indicate that the three conserved  
373 hydrophobic residues of Pit are required for its plasma membrane localization.

374

## 375 **DISCUSSION**

376 Several TNLs and CNLs have been reported to self-associate through their N-terminal  
377 CC or TIR domains; hence, self-association via their N-termini appears to be a general  
378 feature of NLRs (Ade *et al.*, 2007; Maekawa *et al.*, 2011a; El Kasmi *et al.*, 2017). Here,  
379 we found that the rice blast resistance protein Pit also self-associates through at least its  
380 CC domain (Figure 1). Full-length Pit forms homomers in the absence of a pathogen  
381 effector, suggesting that it may self-associate before activation and behave like other  
382 NLRs, such as RPM1, RPS5, and MLA (Ade *et al.*, 2007; El Kasmi *et al.*, 2017).  
383 Previous biophysical analyses have shown that MLA10 is a monomer in solutions but  
384 has a dimeric helix-loop-helix structure in crystals (Maekawa *et al.*, 2011a; Casey *et al.*,  
385 2016). It is possible that the dimeric helix-loop-helix structure of MLA10 occurs under  
386 the special condition because MLA10 is predominantly monomeric in solution and its  
387 character in solution is different from that in the crystals (Casey *et al.*, 2016; Bentham



388 *et al.*, 2018; Burdett *et al.*, 2019). Moreover, the CC domain structures of all other NLRs,  
389 including Rx, Sr33, and ZAR1, exhibit a four-helix bundle structure (Casey *et al.*, 2016;  
390 El Kasmi *et al.*, 2017; Wang *et al.*, 2019a). Single mutations in the hydrophobic  
391 residues (I33, L36, and M43) of  $\alpha 1$  helix of MLA10 markedly suppressed self-  
392 association, resulting in compromised resistance to *Blumeria graminis* f. sp. *hordei*.  
393 We found that introducing the single and triple mutations into Pit did not affect  
394 homomer formation, indicating that these residues make at most a marginal  
395 contribution to self-association (Figure 2). It is possible that Pit displays a four-helix  
396 bundle structure, similar to other NLRs such as Rx, Sr33, and ZAR1. We attempted to  
397 clarify the structure of the CC domain of Pit and produced an expression system for the  
398 CC domain and full-length Pit protein using *E. coli* and insect cells, but we were unable  
399 to obtain intact Pit proteins due to difficulties in expression. The structural analysis of  
400 the Pit CC domain will be a topic for future research.

401 Several CNLs, including RPM1 (Gao *et al.*, 2011), RPS2 (Axtell & Staskawicz,  
402 2003), RPS5 (Qi *et al.*, 2012), and Tm-2<sup>2</sup> (Chen *et al.*, 2017), have been reported to be  
403 localized in the plasma membrane, and this localization is indispensable for their  
404 immune induction. RPM1 appears to anchor to the plasma membrane through the plant  
405 guarder protein RIN4, which is localized to the membrane via palmitoylation (Kim *et*  
406 *al.*, 2005). Two lipid modifications, myristoylation, and palmitoylation, in the CC  
407 domain of RPS5, participate in its plasma localization, protein stability, and function in  
408 an additive manner. We have previously revealed that a free N-terminus of Pit is  
409 required for its function because the N-terminal fusion of GFP compromises cell death  
410 activity (Kawano *et al.*, 2014a). Consistent with this, Pit has two palmitoylation sites in  
411 its CC domain, which play a key role in the plasma membrane localization of Pit  
412 (Kawano *et al.*, 2014a). The resting Pit is localized exclusively in the plasma membrane  
413 (Figure 7) (Kawano *et al.*, 2014a), indicating that plasma membrane localization alone  
414 is not sufficient to trigger activation. The plasma membrane localization of Pit is ATP-  
415 binding activity-dependent because the P-loop mutant of Pit K203R is mislocalized  
416 (Kawano *et al.*, 2010). This feature is similar to other CNLs, including RPM1, TM-22,

417 and RPS5, whose auto active mutants are primarily localized to the plasma membrane  
418 (Qi *et al.*, 2012; Chen *et al.*, 2017; El Kasmi *et al.*, 2017).

419 Recently, the structures of active and inactive forms of ZAR1 have been reported,  
420 revealing a more detailed structural observation of the NLR protein. Inactive ZAR1  
421 forms a monomeric complex with resistance-related kinase (RKS1). *Xanthomonas*  
422 *campestris* pv. *campestris* AvrAC uridylylates the PBS1-like protein 2 (PBL2) kinase to  
423 produce PBL2UMP, which triggers the pentameric ZAR1–RKS1–PBL2UMP  
424 resistosome *in vitro* and *in vivo* (Wang *et al.*, 2019a; Wang *et al.*, 2019b; Hu *et al.*,  
425 2020). Resistosome formation is required for AvrAC-triggered cell death and disease  
426 resistance. The *Pseudomonas syringae* effector HopZ1a also induces the  
427 oligomerization of ZAR1 *in vivo* (Hu *et al.*, 2020). During the transition from the  
428 inactive to the active states of ZAR1, positional translation through unfolding and  
429 refolding in the  $\alpha 4$  helix allows the  $\alpha 1$  helix to be released from the four-helix bundle  
430 (Wang *et al.*, 2019a). This conformational change of the  $\alpha 1$  helix leads to the  
431 pentameric funnel-shaped structure of the CC domain of ZAR1. The funnel-shaped  
432 structure of active ZAR1 is similar to previously characterized pore-forming proteins,  
433 such as mixed lineage kinase-like (MLKL) and hemolytic actinoporin fragaceatoxin C  
434 (FraC) (Tanaka *et al.*, 2015). Notably, FraC showed a similar conformational change  
435 during pore formation to that upon the activation of ZAR1. The N-terminal helix of  
436 FraC is released from the monomer and is capable of forming a funnel-shaped octamer,  
437 leading to its insertion into the cell membrane. The structure of the ZAR1 oligomer  
438 implies that the funnel structure of the CC domain of the ZAR1 oligomer also inserts  
439 into the cell membrane and induces cell death (Wang *et al.*, 2019a). It appears that a  
440 funnel-shaped structure participates in membrane localization (Adachi *et al.*, 2019).  
441 Recently, Adachi *et al.* found the consensus sequence called MADA motif in the N-  
442 termini of various CNLs which matches the N-terminal  $\alpha 1$  helix of ZAR1. They  
443 predicted three residues mapped to the outer surface of the funnel-shaped structure of  
444 NRC4 based on the ZAR1 resistosome structure and substituted these three  
445 hydrophobic residues for negatively charged Glu residues. Those mutants failed to  
446 trigger cell death in *N. benthamiana* and one of the mutants decreased its plasma



447 membrane localization, showing the general importance of insertion of  $\alpha 1$  helix of  
448 CNLs into plasma membrane on their immunity. Since the membrane localization of  
449 Pit is also important for its function (Kawano *et al.*, 2014a), it is possible that the CC  
450 domain of Pit has a funnel-shaped structure similar to that of active ZAR1 and plays an  
451 important role in its membrane localization and cell death. Our experiments showed  
452 that Pit I34E, L37E, and L41E mutants perturbed membrane localization and were  
453 localized in the cytoplasm (Figure 7A, B). In the active Pit model structure based on  
454 the active ZAR1 (PDB code 6J5T), the three hydrophobic residues (I34, L37, and L41)  
455 are located in the  $\alpha 2$  helix but not in the  $\alpha 1$  helix of the funnel-shaped structure,  
456 suggesting that the three hydrophobic residues are not directly involved in membrane  
457 insertion. The three hydrophobic residues, I34, L37, and L41, in the  $\alpha 2$  helix of the Pit  
458 CC domain interact hydrophobically with V75, I78, and V79 in the  $\alpha 3$  helix. The  $\alpha 3$   
459 helix is hydrophobically associated with I500 in the WHD domain and L510 in the LRR  
460 domain (Figure 6C). In addition, D77 in the  $\alpha 3$  helix also forms a hydrogen bond with  
461 K532 in the LRR domain (Figure 6C). D77 is located at the EDVID motif in Pit  
462 (DDIVD in Pit) which is a highly conserved motif in CNLs (Bai *et al.*, 2002). The  
463 EDVID motif directly contacts with LRR domain in the inactive ZAR1 structure  
464 (Burdett *et al.*, 2019; Wang *et al.*, 2019a). In the full-length MLA10 protein, the  
465 mutations of the EDVID motif in MLA10 weaken immune response but the same  
466 mutations in the CC domain fragment do not affect its autoactivity (Bai *et al.*, 2012),  
467 suggesting that the EDVID motif is necessary for both autoinhibition and activation of  
468 MLA10. Like the ZAR1 case, it is possible that the EDVID motif serves as a signal  
469 relay from the LRR domain to the CC domain to induce the large conformational  
470 changes in the NB-LRR region. The three hydrophobic residues (I34, L37, and L41) in  
471 the  $\alpha 2$  helix may support the funnel-shaped structure through interaction with the  $\alpha 3$   
472 helix, which is associated with the WHD and LRR domains. However, the substitutions  
473 of I34, L37, and L41 with Glu may destabilize this foundation for the funnel-shaped  
474 structure and consequently affect the insertion of the funnel-shaped structure formed  
475 by the N-terminal  $\alpha 1$  helix into the membrane. Alternatively, we previously found that  
476 palmitoylation is required for plasma membrane localization of Pit (Kawano *et al.*,

477 2014a) and these mutations in the CC domain of Pit may affect appropriate  
478 palmitoylation. But these speculations need to be tested in the future. The  
479 mislocalization of Pit by the mutations into the conserved hydrophobic residues  
480 disrupted the appropriate localization of the Pit-OsSPK1 complex (Figure 7C). This  
481 may lead to the attenuation of Pit-mediated immune responses.

482

#### 483 **Author Contributions**

484 Q. W. and Y. K. designed the study; Q. W., Y. L., K. K., J. L., D. Z., and Y. K.  
485 performed experiments and analyzed data; Q. W., K. K., and Y. K. wrote the manuscript;  
486 C. L. and D. M. gave technical support; Y. K. provided conceptual advice.

487

#### 488 **Competing financial interests**

489 The authors declare that they have no competing financial interests.

490

491

492 **References**

- 493 **Adachi H, Contreras MP, Harant A, Wu CH, Derevnina L, Sakai T, Duggan C, Moratto**  
494 **E, Bozkurt TO, Maqbool A, et al. 2019.** An N-terminal motif in NLR immune  
495 receptors is functionally conserved across distantly related plant species. *Elife* **8**.
- 496 **Ade J, DeYoung BJ, Golstein C, Innes RW. 2007.** Indirect activation of a plant nucleotide  
497 binding site-leucine-rich repeat protein by a bacterial protease. *Proc Natl Acad Sci U S*  
498 *A* **104**(7): 2531-2536.
- 499 **Akamatsu A, Wong H, Fujiwara M, Okuda J, Nishide K, Uno K, Imai K, Umemura K,**  
500 **Kawasaki T, Kawano Y, et al. 2013.** An OsCEBiP/OsCERK1-OsRacGEF1-OsRac1  
501 module is an essential component of chitin-induced rice immunity. *Cell Host Microbe*  
502 **13**(4): 465-476.
- 503 **Axtell MJ, Staskawicz BJ. 2003.** Initiation of RPS2-specified disease resistance in  
504 Arabidopsis is coupled to the AvrRpt2-directed elimination of RIN4. *Cell* **112**(3): 369-  
505 377.
- 506 **Bai J, Pennill LA, Ning J, Lee SW, Ramalingam J, Webb CA, Zhao B, Sun Q, Nelson JC,**  
507 **Leach JE, et al. 2002.** Diversity in nucleotide binding site-leucine-rich repeat genes in  
508 cereals. *Genome Res* **12**(12): 1871-1884.
- 509 **Bentham AR, Zdrzalek R, De la Concepcion JC, Banfield MJ. 2018.** Uncoiling CNLs:  
510 Structure/Function Approaches to Understanding CC Domain Function in Plant NLRs.  
511 *Plant Cell Physiol* **59**(12): 2398-2408.
- 512 **Bernoux M, Ve T, Williams S, Warren C, Hatters D, Valkov E, Zhang X, Ellis JG, Kobe**  
513 **B, Dodds PN. 2011.** Structural and functional analysis of a plant resistance protein TIR  
514 domain reveals interfaces for self-association, signaling, and autoregulation. *Cell Host*  
515 *Microbe* **9**(3): 200-211.
- 516 **Bigeard J, Colcombet J, Hirt H. 2015.** Signaling mechanisms in pattern-triggered immunity  
517 (PTI). *Mol Plant* **8**(4): 521-539.
- 518 **Burdett H, Bentham AR, Williams SJ, Dodds PN, Anderson PA, Banfield MJ, Kobe B.**  
519 **2019.** The Plant "Resistosome": Structural Insights into Immune Signaling. *Cell Host*  
520 *Microbe* **26**(2): 193-201.
- 521 **Casey LW, Lavrencic P, Bentham AR, Cesari S, Ericsson DJ, Croll T, Turk D, Anderson**  
522 **PA, Mark AE, Dodds PN, et al. 2016.** The CC domain structure from the wheat stem  
523 rust resistance protein Sr33 challenges paradigms for dimerization in plant NLR  
524 proteins. *Proc Natl Acad Sci U S A* **113**(45): 12856-12861.
- 525 **Chakraborty J, Ghosh P. 2020.** Advancement of research on plant NLRs evolution,  
526 biochemical activity, structural association, and engineering. *Planta* **252**(6): 101.
- 527 **Chen L, Hamada S, Fujiwara M, Zhu T, Thao NP, Wong HL, Krishna P, Ueda T, Kaku**  
528 **H, Shibuya N, et al. 2010.** The Hop/Sti1-Hsp90 chaperone complex facilitates the  
529 maturation and transport of a PAMP receptor in rice innate immunity. *Cell Host*  
530 *Microbe* **7**(3): 185-196.
- 531 **Chen T, Liu D, Niu X, Wang J, Qian L, Han L, Liu N, Zhao J, Hong Y, Liu Y. 2017.**  
532 Antiviral Resistance Protein Tm-2(2) Functions on the Plasma Membrane. *Plant*  
533 *Physiol* **173**(4): 2399-2410.
- 534 **Collier SM, Hamel LP, Moffett P. 2011.** Cell death mediated by the N-terminal domains of a  
535 unique and highly conserved class of NB-LRR protein. *Mol Plant Microbe Interact*

- 536           24(8): 918-931.
- 537 **Cui H, Tsuda K, Parker JE. 2015.** Effector-triggered immunity: from pathogen perception to  
538           robust defense. *Annu Rev Plant Biol* **66**: 487-511.
- 539 **Dodds PN, Rathjen JP. 2010.** Plant immunity: towards an integrated view of plant-pathogen  
540           interactions. *Nat Rev Genet* **11**(8): 539-548.
- 541 **El Kasmi F, Chung EH, Anderson RG, Li J, Wan L, Eitas TK, Gao Z, Dangl JL. 2017.**  
542           Signaling from the plasma-membrane localized plant immune receptor RPM1 requires  
543           self-association of the full-length protein. *Proc Natl Acad Sci U S A* **114**(35): E7385-  
544           E7394.
- 545 **Engelhardt S, Boevink PC, Armstrong MR, Ramos MB, Hein I, Birch PR. 2012.**  
546           Relocalization of late blight resistance protein R3a to endosomal compartments is  
547           associated with effector recognition and required for the immune response. *Plant Cell*  
548           **24**(12): 5142-5158.
- 549 **Gao Z, Chung EH, Eitas TK, Dangl JL. 2011.** Plant intracellular innate immune receptor  
550           Resistance to *Pseudomonas syringae* pv. *maculicola* 1 (RPM1) is activated at, and  
551           functions on, the plasma membrane. *Proc Natl Acad Sci U S A* **108**(18): 7619-7624.
- 552 **Hao W, Collier SM, Moffett P, Chai J. 2013.** Structural basis for the interaction between the  
553           potato virus X resistance protein (Rx) and its cofactor Ran GTPase-activating protein  
554           2 (RanGAP2). *J Biol Chem* **288**(50): 35868-35876.
- 555 **Hayashi K, Yasuda N, Fujita Y, Koizumi S, Yoshida H. 2010.** Identification of the blast  
556           resistance gene Pit in rice cultivars using functional markers. *Theor Appl Genet* **121**(7):  
557           1357-1367.
- 558 **Hayashi K, Yoshida H. 2009.** Refunctionalization of the ancient rice blast disease resistance  
559           gene Pit by the recruitment of a retrotransposon as a promoter. *Plant J* **57**(3): 413-425.
- 560 **Heidrich K, Wirthmueller L, Tasset C, Pouzet C, Deslandes L, Parker JE. 2011.**  
561           Arabidopsis EDS1 connects pathogen effector recognition to cell compartment-specific  
562           immune responses. *Science* **334**(6061): 1401-1404.
- 563 **Hu M, Qi J, Bi G, Zhou JM. 2020.** Bacterial Effectors Induce Oligomerization of Immune  
564           Receptor ZAR1 In Vivo. *Mol Plant* **13**(5): 793-801.
- 565 **Jones JD, Dangl JL. 2006.** The plant immune system. *Nature* **444**(7117): 323-329.
- 566 **Jones JD, Vance RE, Dangl JL. 2016.** Intracellular innate immune surveillance devices in  
567           plants and animals. *Science* **354**(6316).
- 568 **Kawano Y, Akamatsu A, Hayashi K, Housen Y, Okuda J, Yao A, Nakashima A, Takahashi**  
569           **H, Yoshida H, Wong HL, et al. 2010.** Activation of a Rac GTPase by the NLR family  
570           disease resistance protein Pit plays a critical role in rice innate immunity. *Cell Host*  
571           *Microbe* **7**(5): 362-375.
- 572 **Kawano Y, Fujiwara T, Yao A, Housen Y, Hayashi K, Shimamoto K. 2014a.** Palmitoylation-  
573           dependent membrane localization of the rice resistance protein pit is critical for the  
574           activation of the small GTPase OsRac1. *J Biol Chem* **289**(27): 19079-19088.
- 575 **Kawano Y, Kaneko-Kawano T, Shimamoto K. 2014b.** Rho family GTPase-dependent  
576           immunity in plants and animals. *Front Plant Sci* **5**: 522.
- 577 **Kawano Y, Shimamoto K. 2013.** Early signaling network in rice PRR- and R-mediated  
578           immunity. *Curr Opin Plant Biol* **16**: 496-504.
- 579 **Kim HS, Desveaux D, Singer AU, Patel P, Sondek J, Dangl JL. 2005.** The *Pseudomonas*

- 580 syringae effector AvrRpt2 cleaves its C-terminally acylated target, RIN4, from  
581 Arabidopsis membranes to block RPM1 activation. *Proc Natl Acad Sci U S A* **102**(18):  
582 6496-6501.
- 583 **Kosami K, Ohki I, Nagano M, Furuita K, Sugiki T, Kawano Y, Kawasaki T, Fujiwara T,**  
584 **Nakagawa A, Shimamoto K, et al. 2014.** The crystal structure of the plant small  
585 GTPase OsRac1 reveals its mode of binding to NADPH oxidase. *J Biol Chem* **289**(41):  
586 28569-28578.
- 587 **Kourelis J, van der Hoorn RAL. 2018.** Defended to the Nines: 25 Years of Resistance Gene  
588 Cloning Identifies Nine Mechanisms for R Protein Function. *Plant Cell* **30**(2): 285-299.
- 589 **Lieberherr D, Thao NP, Nakashima A, Umemura K, Kawasaki T, Shimamoto K. 2005.** A  
590 sphingolipid elicitor-inducible mitogen-activated protein kinase is regulated by the  
591 small GTPase OsRac1 and heterotrimeric G-protein in rice. *Plant Physiol* **138**(3):  
592 1644-1652.
- 593 **Ma S, Lapin D, Liu L, Sun Y, Song W, Zhang X, Logemann E, Yu D, Wang J, Jirschitzka**  
594 **J, et al. 2020.** Direct pathogen-induced assembly of an NLR immune receptor complex  
595 to form a holoenzyme. *Science* **370**(6521).
- 596 **Macho AP, Zipfel C. 2014.** Plant PRRs and the activation of innate immune signaling. *Mol*  
597 *Cell* **54**(2): 263-272.
- 598 **Maekawa T, Cheng W, Spiridon LN, Toller A, Lukasik E, Saijo Y, Liu P, Shen QH, Micluta**  
599 **MA, Somssich IE, et al. 2011a.** Coiled-coil domain-dependent homodimerization of  
600 intracellular barley immune receptors defines a minimal functional module for  
601 triggering cell death. *Cell Host Microbe* **9**(3): 187-199.
- 602 **Maekawa T, Cheng W, Spiridon LN, Toller A, Lukasik E, Saijo Y, Liu P, Shen QH, Micluta**  
603 **MA, Somssich IE, et al. 2011b.** Coiled-coil domain-dependent homodimerization of  
604 intracellular barley immune receptors defines a minimal functional module for  
605 triggering cell death. *Cell Host Microbe* **9**(3): 187-199.
- 606 **Martin R, Qi T, Zhang H, Liu F, King M, Toth C, Nogales E, Staskawicz BJ. 2020.** Structure  
607 of the activated ROQ1 resistosome directly recognizing the pathogen effector XopQ.  
608 *Science* **370**(6521).
- 609 **Mestre P, Baulcombe DC. 2006.** Elicitor-mediated oligomerization of the tobacco N disease  
610 resistance protein. *Plant Cell* **18**(2): 491-501.
- 611 **Ono E, Wong HL, Kawasaki T, Hasegawa M, Kodama O, Shimamoto K. 2001.** Essential  
612 role of the small GTPase Rac in disease resistance of rice. *Proc Natl Acad Sci U S A*  
613 **98**(2): 759-764.
- 614 **Qi D, DeYoung BJ, Innes RW. 2012.** Structure-function analysis of the coiled-coil and leucine-  
615 rich repeat domains of the RPS5 disease resistance protein. *Plant Physiol* **158**(4): 1819-  
616 1832.
- 617 **Shen QH, Saijo Y, Mauch S, Biskup C, Bieri S, Keller B, Seki H, Ulker B, Somssich IE,**  
618 **Schulze-Lefert P. 2007.** Nuclear activity of MLA immune receptors links isolate-  
619 specific and basal disease-resistance responses. *Science* **315**(5815): 1098-1103.
- 620 **Slootweg E, Roosien J, Spiridon LN, Petrescu AJ, Tاملing W, Joosten M, Pomp R, van**  
621 **Schaik C, Dees R, Borst JW, et al. 2010.** Nucleocytoplasmic distribution is required  
622 for activation of resistance by the potato NB-LRR receptor Rx1 and is balanced by its  
623 functional domains. *Plant Cell* **22**(12): 4195-4215.

- 624 **Swiderski MR, Birker D, Jones JD. 2009.** The TIR domain of TIR-NB-LRR resistance  
625 proteins is a signaling domain involved in cell death induction. *Mol Plant Microbe*  
626 *Interact* **22**(2): 157-165.
- 627 **Takken FL, Albrecht M, Tameling WI. 2006.** Resistance proteins: molecular switches of plant  
628 defence. *Curr Opin Plant Biol* **9**(4): 383-390.
- 629 **Tameling WI, Nooijen C, Ludwig N, Boter M, Slootweg E, Goverse A, Shirasu K, Joosten**  
630 **MH. 2010.** RanGAP2 mediates nucleocytoplasmic partitioning of the NB-LRR  
631 immune receptor Rx in the Solanaceae, thereby dictating Rx function. *Plant Cell* **22**(12):  
632 4176-4194.
- 633 **Tanaka K, Caaveiro JM, Morante K, Gonzalez-Manas JM, Tsumoto K. 2015.** Structural  
634 basis for self-assembly of a cytolytic pore lined by protein and lipid. *Nat Commun* **6**:  
635 6337.
- 636 **Wang GF, Ji J, El-Kasmi F, Dangl JL, Johal G, Balint-Kurti PJ. 2015.** Molecular and  
637 functional analyses of a maize autoactive NB-LRR protein identify precise structural  
638 requirements for activity. *PLoS Pathog* **11**(2): e1004674.
- 639 **Wang J, Hu M, Wang J, Qi J, Han Z, Wang G, Qi Y, Wang HW, Zhou JM, Chai J. 2019a.**  
640 Reconstitution and structure of a plant NLR resistosome conferring immunity. *Science*  
641 **364**(6435).
- 642 **Wang J, Wang J, Hu M, Wu S, Qi J, Wang G, Han Z, Qi Y, Gao N, Wang HW, et al. 2019b.**  
643 Ligand-triggered allosteric ADP release primes a plant NLR complex. *Science*  
644 **364**(6435): 43.
- 645 **Wang Q, Li Y, Ishikawa K, Kosami KI, Uno K, Nagawa S, Tan L, Du J, Shimamoto K,**  
646 **Kawano Y. 2018.** Resistance protein Pit interacts with the GEF OsSPK1 to activate  
647 OsRac1 and trigger rice immunity. *Proc Natl Acad Sci U S A* **115**(49): E11551-E11560.
- 648 **Williams SJ, Sohn KH, Wan L, Bernoux M, Sarris PF, Segonzac C, Ve T, Ma Y, Saucet**  
649 **SB, Ericsson DJ, et al. 2014.** Structural basis for assembly and function of a  
650 heterodimeric plant immune receptor. *Science* **344**(6181): 299-303.
- 651 **Wong HL, Akamatsu A, Wang Q, Higuchi M, Matsuda T, Okuda J, Kosami KI, Inada N,**  
652 **Kawasaki T, Kaneko-Kawano T, et al. 2018.** In vivo monitoring of plant small  
653 GTPase activation using a Forster resonance energy transfer biosensor. *Plant Methods*  
654 **14**: 56.
- 655 **Yalovsky S. 2015.** Protein lipid modifications and the regulation of ROP GTPase function. *J*  
656 *Exp Bot* **66**(6): 1617-1624.
- 657 **Zhang X, Bernoux M, Bentham AR, Newman TE, Ve T, Casey LW, Raaymakers TM, Hu**  
658 **J, Croll TI, Schreiber KJ, et al. 2017.** Multiple functional self-association interfaces  
659 in plant TIR domains. *Proc Natl Acad Sci U S A* **114**(10): E2046-E2052.
- 660 **Zhou Z, Pang Z, Zhao S, Zhang L, Lv Q, Yin D, Li D, Liu X, Zhao X, Li X, et al. 2019.**  
661 Importance of OsRac1 and RAI1 in signalling of NLR protein-mediated resistance to  
662 rice blast disease. *New Phytol.*
- 663
- 664
- 665
- 666



667 **FIGURE LEGENDS**

668 **Figure 1. The CC domain and full-length Pit self-associate**

669 **A**, Co-IP assay to assess self-association of full-length Pit in *N. benthamiana*. Total  
670 protein extract was immunoprecipitated with anti-HA antibody, and western blotting  
671 was then carried out with anti-HA and anti-Myc antibodies. **B**, Yeast two-hybrid assay  
672 to test self-association of the Pit CC domain. Growth of yeast cells coexpressing GAL4-  
673 AD or GAL4-BD fused with the CC domain of Pit on selective medium without  
674 histidine (-His) represents a positive interaction. AD: GAL4 activation domain, BD:  
675 GAL4 DNA-binding domain. **C**, Co-IP assay to assess self-association of the Pit CC  
676 domain in *N. benthamiana*. Total protein extract was immunoprecipitated with anti-  
677 GFP antibody, and western blotting was then carried out with anti-GFP and anti-Myc  
678 antibodies. **D**, GST pull-down assay to verify the self-association of the Pit CC domain.  
679 Purified GST or GST-tagged Pit CC immobilized on Sepharose was incubated with His-  
680 SUMO-tagged Pit CC. After washing, the bound proteins were eluted by addition of  
681 SDS loading buffer for immunoblotting with anti-GST and anti-SUMO.

682

683 **Figure 2. Conserved hydrophobic residues in the Pit CC domain are not involved**  
684 **in Pit self-association**

685 **A**, Multiple alignment of Pit with various CNLs. **B**, Model structure of the Pit CC  
686 domain, based on the MLA10 CC domain (Protein Data Bank ID code 3QFL), shows  
687 the elongated dimer (blue and pink), stabilized by hydrophobic residues (I34, L37, and  
688 L41). The figure was drawn using PyMOL. **C**, *In vitro* pull-down assay to test the self-  
689 association of Pit CC mutants. Purified GST or GST-tagged Pit CC mutants  
690 immobilized on Sepharose was incubated with His-SUMO-tagged Pit CC mutants.  
691 After washing, the bound proteins were eluted by addition of SDS loading buffer for  
692 immunoblotting. Anti-GST and anti-SUMO antibodies were used for western blotting.  
693 **D**, Yeast two-hybrid assay to test self-association of Pit CC mutants. Growth of yeast  
694 cells coexpressing GAL4-AD or GAL4-BD fused with the CC domain of Pit on  
695 selective medium (-LWHA) represents a positive interaction.  $10^{-1}$ ,  $10^{-2}$ , and  $10^{-3}$   
696 indicate dilution ratio. **E**, Co-IP assay to examine self-association of full-length Pit

697 mutants in *N. benthamiana*. Total protein extract was immunoprecipitated with anti-  
698 GFP antibody, and western blotting was then carried out with anti-GFP and anti-Myc  
699 antibodies. The post-transfer membrane was stained with Ponceau S.

700

701 **Figure 3. Conserved hydrophobic residues in the Pit CC domain contribute to Pit-**  
702 **mediated immune signaling**

703 **A**, Cell death phenotypes induced by transient expression of Pit mutants in *N.*  
704 *benthamiana*. Photos were taken at 2 dpi. The circles indicate the infiltrated regions. **B**,  
705 Effect of three hydrophobic residues on Pit D485V-induced ROS production in *N.*  
706 *benthamiana*. ROS production was examined by DAB staining at 2 dpi. **C**, Cell death  
707 activity of Pit mutants in rice protoplasts. Relative luciferase activity (GUS=100) is  
708 shown. Data are expressed as mean  $\pm$  standard error (SE) (\*\* $P < 0.01$ ,  $n = 3$ ). **D** and **E**,  
709 Responses, in plants overexpressing Pit WT or mutants, to infection with the  
710 incompatible *M. oryzae* race 007.0. **D**, Photograph shows typical phenotypes of  
711 transgenic and WT plants at 7 dpi. **E**, Statistical analysis of lesion length was performed  
712 at 6 dpi. Relative lesion length [Nippobnare (NB) = 1] is shown. Data are expressed as  
713 mean  $\pm$  standard error (SE) (\* $P < 0.05$ ;  $n \geq 30$ ). **F**, Growth of the incompatible *M.*  
714 *oryzae* race in Nipponbare wild-type plants and transgenic plants overexpressing Pit  
715 WT or mutants. Relative infection ratio (NB = 1) is shown. Data are expressed as mean  
716  $\pm$  standard error (SE) (\* $P < 0.05$ ; \*\* $P < 0.01$ ;  $n = 10$ ).

717

718 **Figure 4. Mutations in three hydrophobic residues do not affect binding to**  
719 **OsSPK1 or OsRac1 but perturb Pit-mediated OsRac1 activation**

720 **A**, Co-IP to test the interaction between OsSPK1 and Pit hydrophobic residue mutants  
721 in *N. benthamiana*. Total protein extract was immunoprecipitated with anti-GFP  
722 antibody, and western blotting was then carried out with anti-GFP and anti-HA  
723 antibodies. The post-transfer membrane was stained with Ponceau S. **B**, Co-IP to test  
724 the interaction between OsRac1 and Pit hydrophobic residue mutants in *N.*  
725 *benthamiana*. Total protein extract was immunoprecipitated with anti-GFP antibody,  
726 and western blotting was then carried out with anti-GFP and anti-Myc antibodies. The



727 post-transfer membrane was stained with Ponceau S. **C** and **D**, *In vivo* OsRac1  
728 activation by Pit hydrophobic residues mutants. **C**, Emission ratio images of confocal  
729 laser-scanning micrographs of rice protoplasts coexpressing Raichu-OsRac1 and the  
730 indicated Pit mutants, or negative control GUS. Scale bars, 5  $\mu\text{m}$ . **D**, Quantification of  
731 normalized emission ratios of Venus to CFP. Data are expressed as mean  $\pm$  standard  
732 error (SE) (\*\* $P < 0.01$ ,  $n = 60$ ).

733

#### 734 **Figure 5. The CC domain of various NLRs**

735 **A**, The main chains of the CC domain structure of Sr33 (blue, solution NMR condition,  
736 Protein Data Bank ID code 2NCG), Rx (light blue, crystal condition, Protein Data Bank  
737 ID code 4M70), and inactivated ZAR1 (orange, electron microscopy condition, 6J5W,  
738 residues 1–113) were superimposed using PyMOL. **B**, Comparison of conserved  
739 hydrophobic residues of Pit (residues 1–115), inactivated ZAR1 (residues 1–113),  
740 Sr33, and Rx. The side chains of three key hydrophobic residues in Pit (I34, L37, and  
741 L41) and equivalent residues in inactivated ZAR1 1–113 (L31, L34, and L38), Rx (I33,  
742 L36, and L40), Sr33 (L24, F27, and L31), as well as the side chains of amino acids  
743 thought to be involved in hydrophobic interactions with these three residues, are shown  
744 in stick representation. **C**, Model structure and domain composition of full-length Pit,  
745 based on inactivated ZAR1 (Protein Data Bank ID code 6J5W), shows the monomeric  
746 state. The figure was drawn using PyMOL.

747

#### 748 **Figure 6. Homology modeling of Pit using activated ZAR1 as a template**

749 **A**, Comparison of the inactivated and activated Pit model structures. The model  
750 structures of inactivated and activated Pit are based on the structures of inactivated  
751 ZAR1 (Protein Data Bank ID code 6J5W) and activated ZAR1 (Protein Data Bank ID  
752 code 6J5T). Conformational changes (black arrows) between the activated and  
753 inactivated forms of Pit occur around the hinge linking the HD domain (blue) and WHD  
754 domain (pink) of Pit and also at the  $\alpha 1$  helix of the CC domain (orange). **B**, Model  
755 structure of the activated Pit pentamer. The extreme N-terminal  $\alpha 1$  helix of the Pit  
756 pentamer may be required for the plasma membrane association of Pit. The CC, NBD,

757 HD1, WHD, and LRR domains are shown in orange, green, blue, pink, and yellow,  
758 respectively. **C**, Hydrophobic interactions among  $\alpha 2$  (I34, L37, and L41),  $\alpha 3$  (F73, V75,  
759 I78, and V79), and WHD domain (I500 and L510) in the activated Pit pentamer model  
760 structure are shown. Residues that may be important for hydrophobic interactions in Pit  
761 function are shown in green, and hydrogen-bonded side chains are shown in light  
762 blue. **D**, Comparison of the interaction around  $\alpha 1$  of the activated ZAR1 structure  
763 (Protein Data Bank ID code 6J5T) and the active Pit oligomer model structure. Residues  
764 involved in hydrophobic interaction around  $\alpha 1$  are shown in green, and hydrogen-  
765 bonded side chains are shown in light blue. The figure was drawn using PyMOL.

766

767 **Figure 7. Mutations in the conserved hydrophobic residues of Pit influence its**  
768 **plasma membrane localization**

769 **A** and **B**, Subcellular localization of Pit mutants in rice protoplasts and *N. benthamiana*  
770 leaves. **A**, Rice protoplasts were cotransfected with the indicated *Pit-Venus* mutants and  
771 *OsFLS2-mCherry*. Scale bars, 5  $\mu\text{m}$ . **B**, Tobacco leaves were injected with  
772 *Agrobacterium* carrying *Pit-GFP* mutants (green) and stained with FM4-64 (red:  
773 plasma membrane marker). Enlarged images of the boxed areas are shown in the right  
774 panels. Scale bars, 25  $\mu\text{m}$ . **C** and **D**, BiFC to detect interactions between Pit  
775 hydrophobic residue mutants and OsSPK1 (**C**) or OsRac1 (**D**). Expression constructs  
776 were transiently expressed in *N. benthamiana* after agroinfiltration. Empty vector  
777 served as a negative control. FM4-64 was used as a plasma membrane marker. Images  
778 were captured at 45 h post-infiltration. Enlarged images of the boxed areas in (**C**) are  
779 shown in the right panels. Scale bars, 25  $\mu\text{m}$ .

780

781

782

## 783 **EXPERIMENTAL PROCEDURES**

### 784 **Plasmid Construction**

785 For Gateway system-constructed plasmids, the target genes and fragments were first  
786 cloned into the pENTR/D-TOPO vector (Invitrogen), and then transferred by LR  
787 reaction into multiple destination vectors depending on the experimental requirements.  
788 For site-directed mutagenesis, overlapping PCR amplification using site-specific and  
789 mutagenic primers and pENTR templates was employed to generate *Pit* mutants. For  
790 pull-down and yeast two-hybrid assays, *Pit* mutants were directly cloned into the  
791 6×His-SUMO, pGADT7, and pGBKT7 vectors, using restriction enzymes and T4  
792 ligase (New England Biolabs).

793

### 794 **Yeast Two-Hybrid Assay**

795 The Y2HGold-GAL4 system was used to test interactions between target proteins by  
796 transforming GAL4-AD/BD fused *Pit* plasmids into Y2HGold chemically competent  
797 cells (Weidibio: YC1002).

798

### 799 **Transient Expression and HR Assays**

800 Agroinfiltration of *N. benthamiana* was conducted as described previously (Kawano *et*  
801 *al.*, 2010). *Agrobacterium tumefaciens* strain GV3101 carrying the helper plasmid  
802 pSoup and binary plasmids was grown overnight at 28°C to an optical density at 600  
803 nm (OD<sub>600</sub>) of around 0.8. Agrobacterial cells were harvested, resuspended in 10 mM  
804 MgCl<sub>2</sub>, 10 mM MES-NaOH (pH 5.6), and 150 μM acetosyringone, adjusted to OD<sub>600</sub>  
805 = 0.4, and incubated at 23°C for 2–3 h before infiltration. We also used the p19 silencing  
806 suppressor to enhance gene expression. For coexpression of two proteins,  
807 *Agrobacterium* carrying the appropriate two constructs and p19 helper plasmid-  
808 containing bacteria were mixed at 1:1:1 volume ratio. The uppermost 3 or 4 leaves of  
809 4-week-old *N. benthamiana* plants were selected for injection, and inoculated plants  
810 were kept in a growth room at 25°C for 2 days.

811 Transient expression of *Pit* mutants in tobacco leaves was performed according to  
812 the method described above. Each bacterial inoculum was infiltrated in a circle with a

813 diameter of 1 cm on each of 15 leaves for three independent experiments. After 2–3  
814 days, cell death symptoms became visible and were photographed.

815 For ROS detection and quantification assay, the infiltrated leaves expressing *Pit*  
816 mutants or negative control GFP were collected and floated in 1 mg/ml DAB solution  
817 for 5 h at room temperature. To visualize ROS *in situ*, the leaves were then decolorized  
818 with ethanol by boiling several times in a microwave oven until the chlorophyll was  
819 removed completely. ROS production of each sample was quantified by measuring the  
820 pixel intensities of the infected regions using ImageJ software (National Institutes of  
821 Health). The mean pixel intensity from three spots outside the infiltrated regions on  
822 each leaf was used to subtract background. Relative DAB staining intensity was  
823 calculated based on the mean pixel intensity of the GFP-infected region on each leaf to  
824 compare between different leaves.

825

## 826 **Plant Growth and Infection**

827 All of transgenic rice plants used in this study were produced by the core facility of  
828 Shanghai Center for Plant Stress Biology. T0 generation of transgenic plants were used  
829 for infection analysis because introduced *Pit* WT gene did not successfully transmit T1  
830 generation due to unknown reasons. Nipponbare plants were grown at 30°C for 5–6  
831 weeks before being infected with the *M. oryzae* strain Ina86-137 (Race 007.0) (Hayashi  
832 & Yoshida, 2009). Infection of leaf blades by the punch method was performed as  
833 reported previously (Ono *et al.*, 2001; Kawano *et al.*, 2010). Lesion length and fungus  
834 growth were measured at 7 dpi. Photographs of disease lesions were taken at 6 dpi.

835

## 836 **Expression Analysis**

837 Total RNA from rice was extracted using TRIzol reagent (Invitrogen). Total RNA (500  
838 ng) was used for cDNA synthesis with a commercial kit (Vazyme) according to the  
839 manufacturer's protocol. The cDNA was analyzed semi-quantitatively using normal  
840 polymerase mix. Total genomic DNA was extracted by the CTAB method and then  
841 subjected to quantitative analysis using SYBR Green Supermix (Bio-Rad) on a CFX96  
842 Touch Real-Time PCR Detection System (Bio-Rad). *OsUbiquitin* was used as an

843 internal control for normalization. Sequences of RT-PCR and RT-qPCR primers are  
844 listed in supplemental Table 1.

845

#### 846 **Raichu-OsRac1 FRET Analysis**

847 The Raichu intramolecular FRET system was applied as described previously (Kawano  
848 *et al.*, 2010; Wong *et al.*, 2018). Rice protoplasts were transformed with *Raichu-OsRac1*  
849 and *Pit* mutants or *GUS* vectors by the PEG method. Images of transformed cells were  
850 captured using a LEICA SMD FLCS microscope. Raichu-OsRac1 was excited using a  
851 440 nm solid-state laser. The Venus and CFP filters were  $550 \pm 25$  nm and  $470 \pm 20$  nm,  
852 respectively.

853

#### 854 **Protein Expression and Purification**

855 His-SUMO tag- and glutathione-S-transferase (GST) tag-fused Pit CC (amino acids 1-  
856 140) were expressed in *Escherichia coli* strain BL21(DE3) Codon Plus. The bacteria  
857 were cultured at 37°C until the OD<sub>600</sub> of the suspension of the medium was around 0.8.  
858 The recombinant proteins were induced with 0.3 mM IPTG for 12 h at 18°C. For protein  
859 purification, the bacterial cells were collected, resuspended, and sonicated in a lysis  
860 buffer (20 mM Tris-HCl [pH 8.0], 150 mM NaCl, 1 mM DTT). The proteins were then  
861 purified by affinity chromatography using Ni-NTA agarose resin and Glutathione  
862 Sepharose 4B resin (GE Healthcare), respectively.

863

#### 864 ***In Vitro* Pull-down Assay**

865 Equal amounts of His-SUMO-Pit CC and GST-Pit CC WT or mutated proteins in  
866 binding buffer (50 mM Tris-HCl [pH 7.5], 150 mM NaCl, 0.1% Triton X-100, 1 mM  
867 EDTA, and 1 mM DTT) were mixed to 200  $\mu$ l for each reaction and incubated at 4°C  
868 for 5 min with gentle rotation. Glutathione Sepharose 4B resin was added to the solution  
869 for precipitation. The beads were washed five times with binding buffer and separated  
870 from the solution by centrifugation at  $2500 \times g$  for 2 min. The proteins were then eluted  
871 with 100  $\mu$ l 2 $\times$ SDS loading buffer for immunoblotting. Anti-SUMO (GenScript:  
872 A01693) and anti-GST (Abmart: M20007) antibodies were used.

873

#### 874 **Subcellular Localization**

875 Confocal fluorescence pictures were recorded under a Leica TCS-SP8 microscope,  
876 using 60×water-immersion objectives. A 488-nm laser was used to image GFP; a 514-  
877 nm laser was used to image Venus; and a 598-nm laser was used to image mCherry. For  
878 samples stained with a plasma membrane marker, FM4-64 (Invitrogen: F34653)  
879 solution was injected to the infiltrated leaves before harvesting and observation. The  
880 signals of FM4-64 were excited with a 566-nm laser.

881

#### 882 **Luciferase Activity Assay in Rice Protoplasts**

883 Isolation of rice protoplasts and PEG transformation were performed as described  
884 previously (Kawano *et al.*, 2010; Wang *et al.*, 2018). Protein preparation and luciferase-  
885 substrate interaction were conducted with a Luciferase Assay Report Kit (Promega).  
886 Luciferase activity was measured by a microplate reader (Thermo Scientific Varioskan  
887 Flash). We used mean values of three independent replications.

888

#### 889 **Co-immunoprecipitation Assays**

890 An *in vivo* co-immunoprecipitation (co-IP) assay was performed as previously reported  
891 (Wang *et al.*, 2018). The infiltrated tobacco leaves were ground to powder in liquid  
892 nitrogen and homogenized in IP buffer (50 mM Tris-HCl [pH 7.5], 150 mM NaCl, 10%  
893 glycerol, 0.2% NP-40, 1 mM EDTA, 5 mM DTT, and EDTA-free protease inhibitor  
894 [Roche]). Anti-GFP agarose resin (Chromotek, GFP-Trap A, gta-20) was added to the  
895 extracted protein solution for precipitation. The GFP beads were washed five times and  
896 then subjected to immunoblot analysis together with input samples. Anti-Myc (Cell  
897 Signaling: #2276S), anti-HA (Roche: 11867423001), and anti-GFP (Abcam: ab6556)  
898 antibodies were used for western blot.

899

#### 900 **Bimolecular Fluorescence Complementation (BiFC)**

901 OsSPK1-cYFP, cYFP-OsRac1, and Pit-nYFP mutants were transiently expressed in *N.*  
902 *benthamiana* leaves according to the method described above. The signals of YFP were

903 observed under a Leica TCS-SP8 microscope. A 514-nm laser was used to excite the  
904 YFP fluorescence and signals between 525 nm and 575 nm were recorded.

905

## 906 **Statistical Analysis and Biological Repetitions**

907 Means were compared by using a *t* test (two-tailed; type 2). SEs were calculated in  
908 Microsoft Excel software. All of assays (including Co-IP, Y2H, Pull down, etc.) in this  
909 study were independently repeated at least three times.

910

911 **Supplemental information includes the following items:**

### 912 **1. Two supplemental figures and legends.**

913 Figure S1 is related to Figure 3.

914 Figure S2 is related to Figure 4.

### 915 **2. One supplemental table**

916 Table S1. List of primers for experimental procedures

917

### 918 **Figure S1. Effect of conserved hydrophobic residue mutations on Pit signaling**

919 **A**, Protein expression of Pit CC WT and mutants in Y2HGold yeast cells. Anti-HA and  
920 anti-Myc antibodies were used for western blot to detect baits and preys, respectively.

921 The post-transfer membrane was stained with Ponceau S. **B**, Quantitative analysis of  
922 the effect of I34, L37, and L41 mutation on Pit D485V-induced ROS production in *N.*

923 *benthamiana*. Bars indicate DAB staining intensity relative to that observed after

924 infiltration with negative control GFP. Data are expressed as mean  $\pm$  standard error (SE)

925 (\*\*:  $P < 0.01$ ;  $n = 10$ ). Relative intensity of DAB staining (GUS=50) is shown. **C**, HA-

926 tagged Pit mutants were transiently expressed in *N. benthamiana* leaves. After 2 days,

927 the total proteins of infiltrated leaves were extracted for immunoblotting with anti-HA

928 antibody. NI indicates non-infiltrated leaves. The post-transfer membrane was stained

929 with Ponceau S and used as an internal control. **D**, Venus-tagged Pit mutants were

930 transiently expressed in rice protoplasts. After 14 h, total protein was extracted with

931 SDS loading buffer, and western blotting was then carried out with anti-GFP antibody.

932 NT indicates a non-transformed sample. The post-transfer membrane was stained with

933 Ponceau S.

934

935 **Figure S2. Three hydrophobic residues in the Pit CC domain are not necessary for**  
936 **binding to OsSPK1**

937 **A**, Transcript levels of exogenous *Pit* WT and *Pit* mutants were measured by RT-PCR.  
938 Numbers indicate independent transgenic lines. *Ubiquitin* was used as an internal  
939 control. **B**, *In vitro* binding assay between Pit CC mutants and OsSPK1. Purified GST  
940 or GST-tagged Pit CC mutants immobilized on Sepharose were incubated with His-  
941 SUMO-tagged OsSPK1 (amino acids 1334–1835). After washing, the bound proteins  
942 were eluted by addition of SDS loading buffer. Anti-GST and anti-SUMO antibodies  
943 were used for subsequent western blotting analysis. **C**, Co-IP to analyze the interaction  
944 in *N. benthamiana* between OsSPK1 (amino acids 1002–1835) and full-length Pit with  
945 mutations in three conserved hydrophobic residues. Total protein extract was  
946 immunoprecipitated with anti-GFP antibody, and western blotting was then carried out  
947 with anti-GFP and anti-Myc antibodies. The post-transfer membrane was stained with  
948 Ponceau S.

949

950

951

952

953



# Wang et al., Figure 1

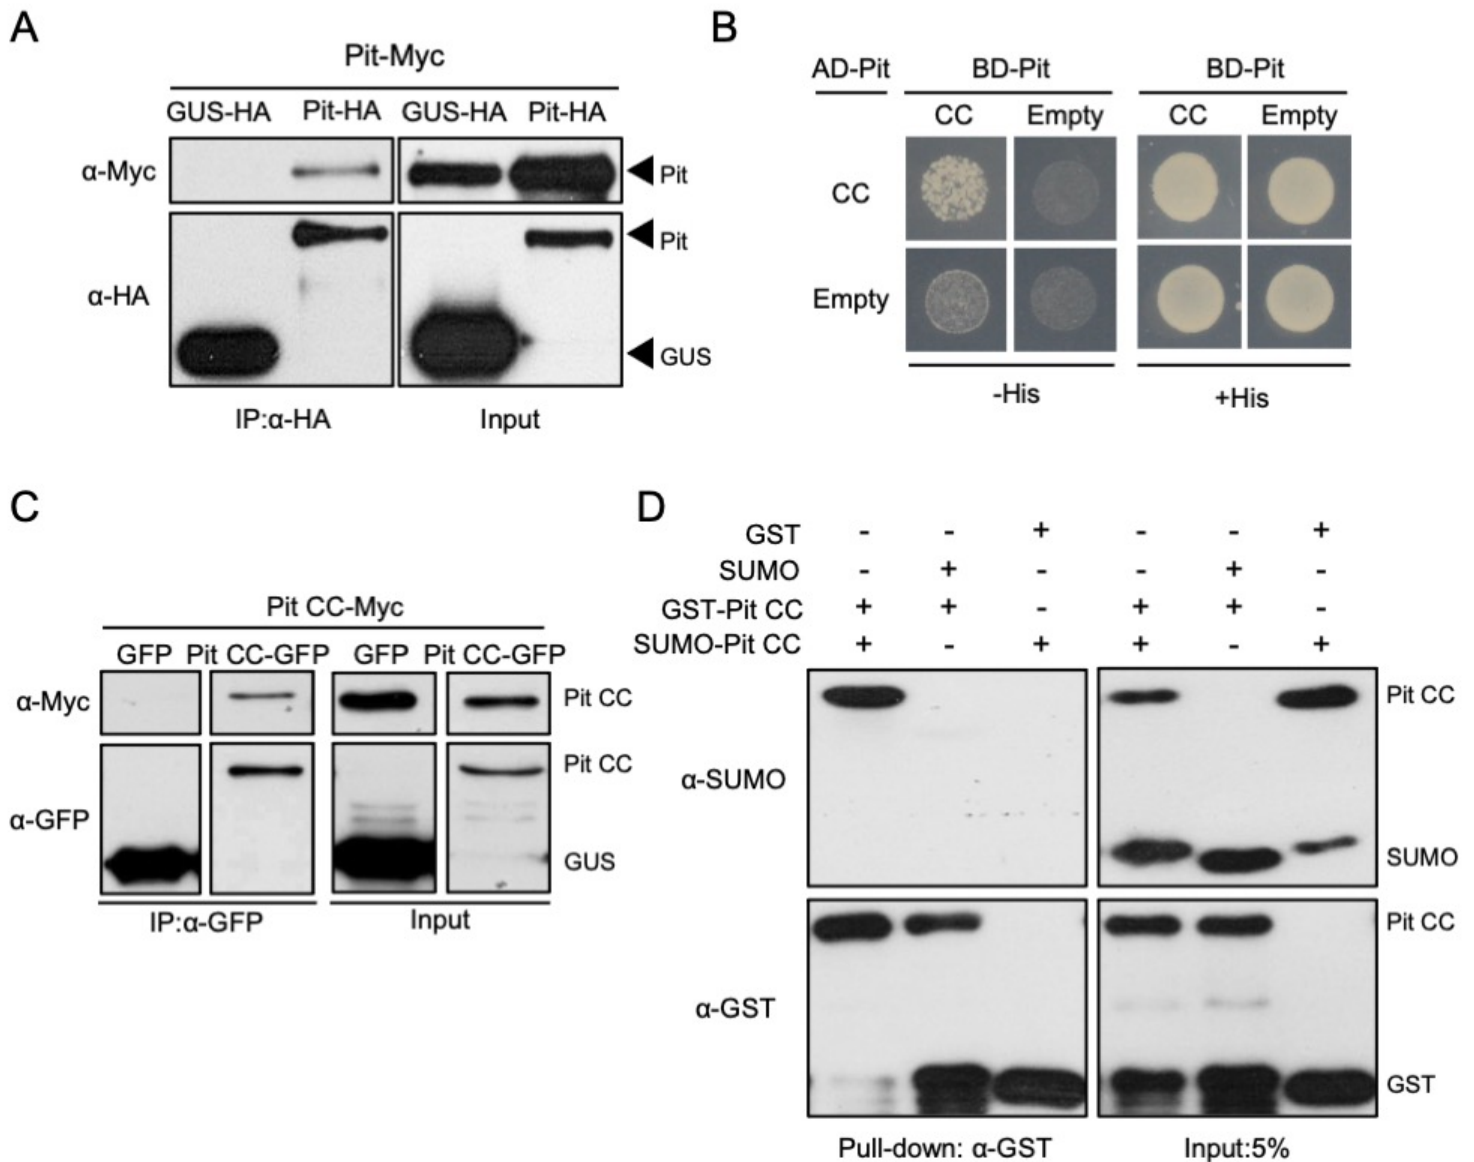

## Figure 1. The CC domain and full-length Pit self-associate

**A**, Co-IP assay to assess self-association of full-length Pit in *N. benthamiana*. Total protein extract was immunoprecipitated with anti-HA antibody, and western blotting was then carried out with anti-HA and anti-Myc antibodies. **B**, Yeast two-hybrid assay to test self-association of the Pit CC domain. Growth of yeast cells coexpressing GAL4-AD or GAL4-BD fused with the CC domain of Pit on selective medium without histidine (-His) represents a positive interaction. AD: GAL4 activation domain, BD: GAL4 DNA-binding domain. **C**, Co-IP assay to assess self-association of the Pit CC domain in *N. benthamiana*. Total protein extract was immunoprecipitated with anti-GFP antibody, and western blotting was then carried out with anti-GFP and anti-Myc antibodies. **D**, GST pull-down assay to verify the self-association of the Pit CC domain. Purified GST or GST-tagged Pit CC immobilized on Sepharose was incubated with His-SUMO-tagged Pit CC. After washing, the bound proteins were eluted by addition of SDS loading buffer for immunoblotting with anti-GST and anti-SUMO.

## Wang et al., Figure 2

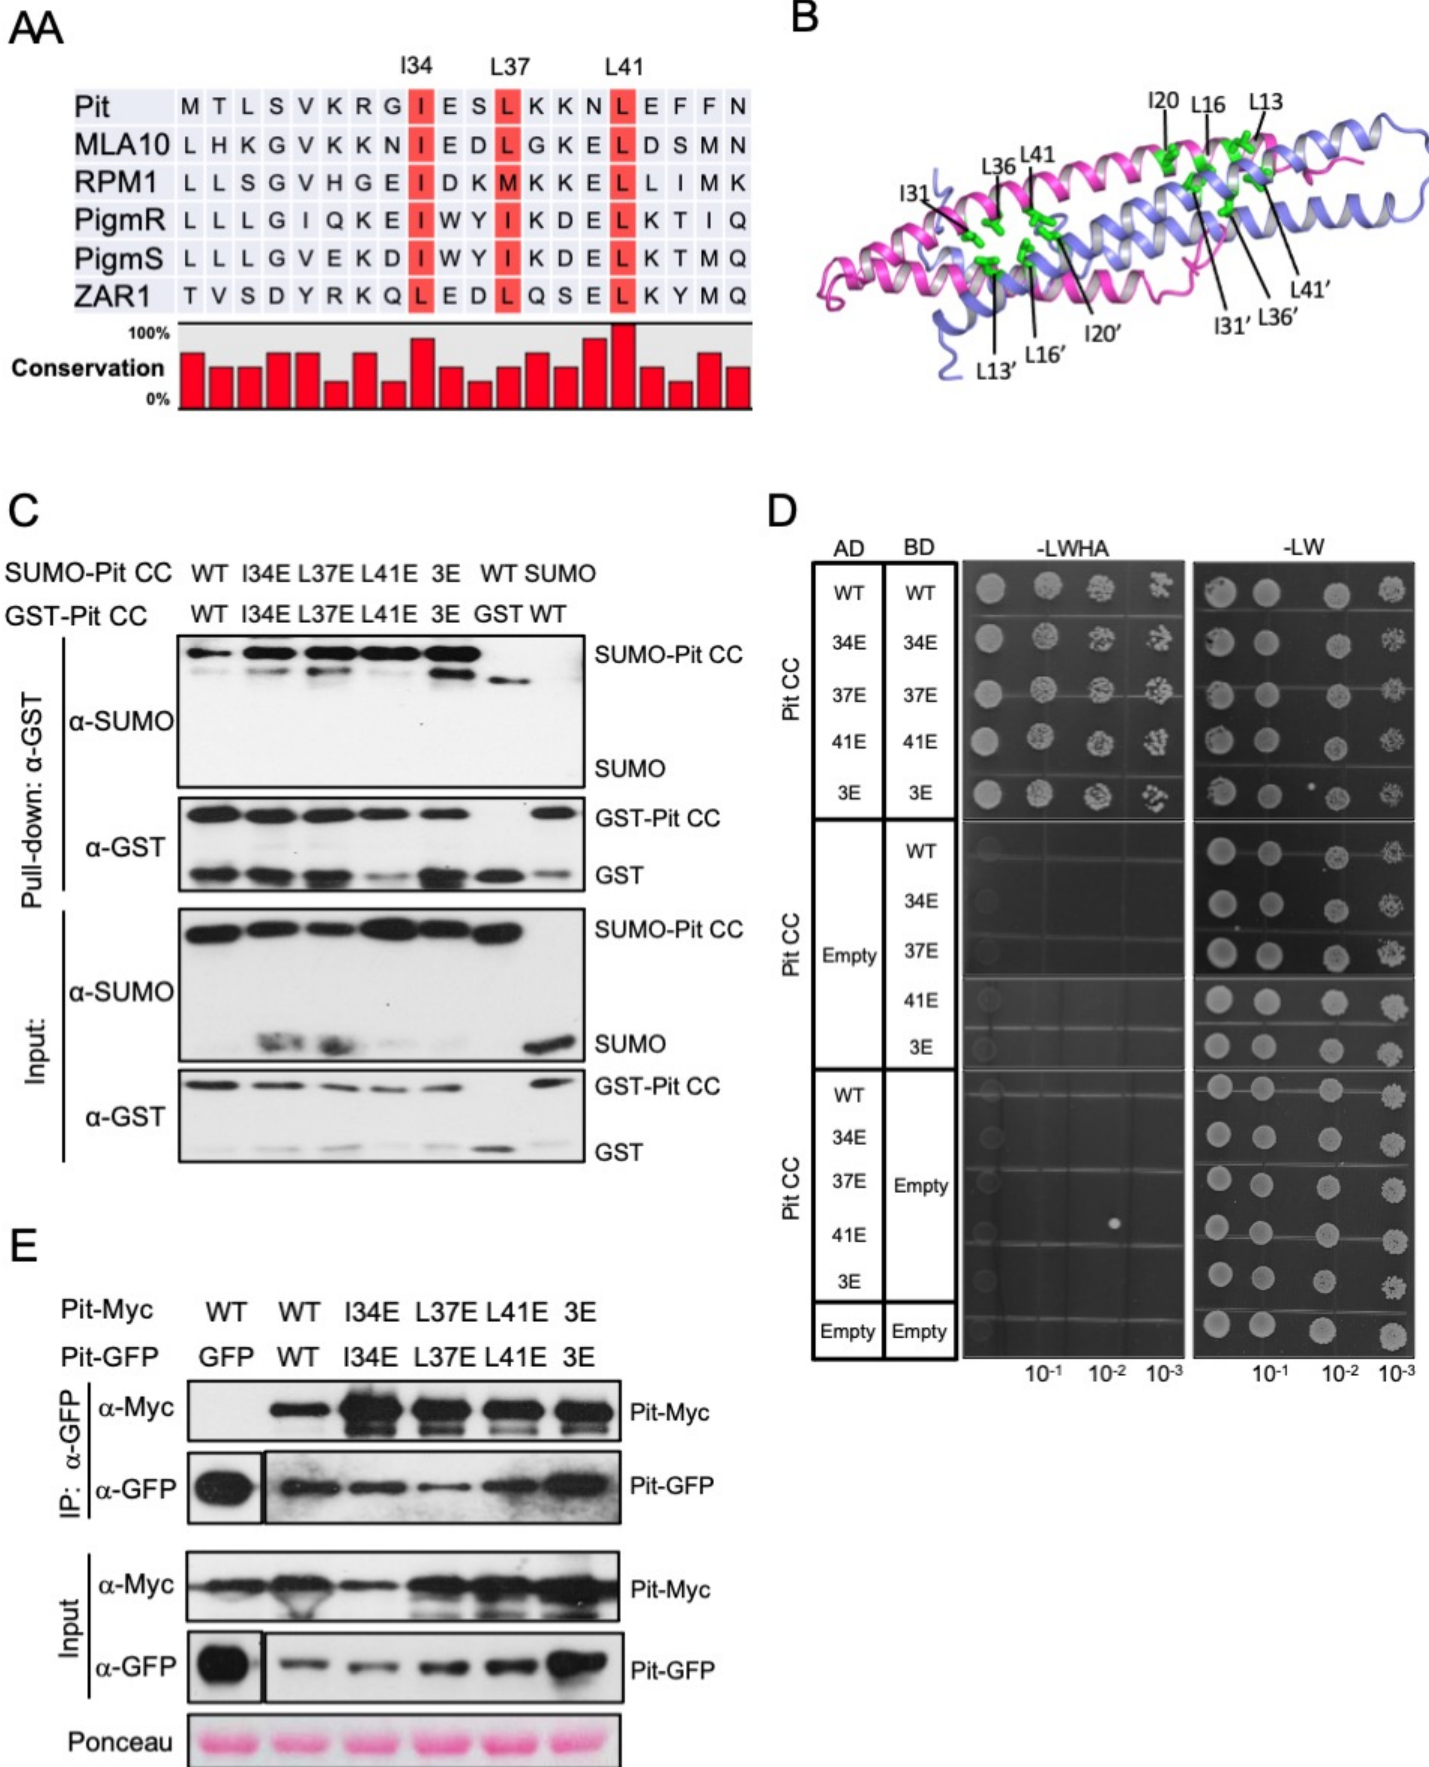

**Figure 2. Conserved hydrophobic residues in the Pit CC domain are not involved in Pit self-association**

**A**, Multiple alignment of Pit with various CNLs. **B**, Model structure of the Pit CC domain, based on the MLA10 CC domain (Protein Data Bank ID code 3QFL), shows the elongated dimer (blue and pink), stabilized by hydrophobic residues (I34, L37, and L41). The figure was drawn using PyMOL. **C**, *In vitro* pull-down assay to test the self-association of Pit CC mutants. Purified GST or GST-tagged Pit CC mutants immobilized on Sepharose was incubated with His-SUMO-tagged Pit CC mutants. After washing, the bound proteins were eluted by addition of SDS loading buffer for immunoblotting. Anti-GST and anti-SUMO antibodies were used for western blotting. **D**, Yeast two-hybrid assay to test self-association of Pit CC mutants. Growth of yeast cells coexpressing GAL4-AD or GAL4-BD fused with the CC domain of Pit on selective medium (-LWHA) represents a positive interaction.  $10^{-1}$ ,  $10^{-2}$ , and  $10^{-3}$  indicate dilution ratio. **E**, Co-IP assay to examine self-association of full-length Pit mutants in *N. benthamiana*. Total protein extract was immunoprecipitated with anti-GFP antibody, and western blotting was then carried out with anti-GFP and anti-Myc antibodies. The post-transfer membrane was stained with Ponceau S.



Wang et al., Figure 3

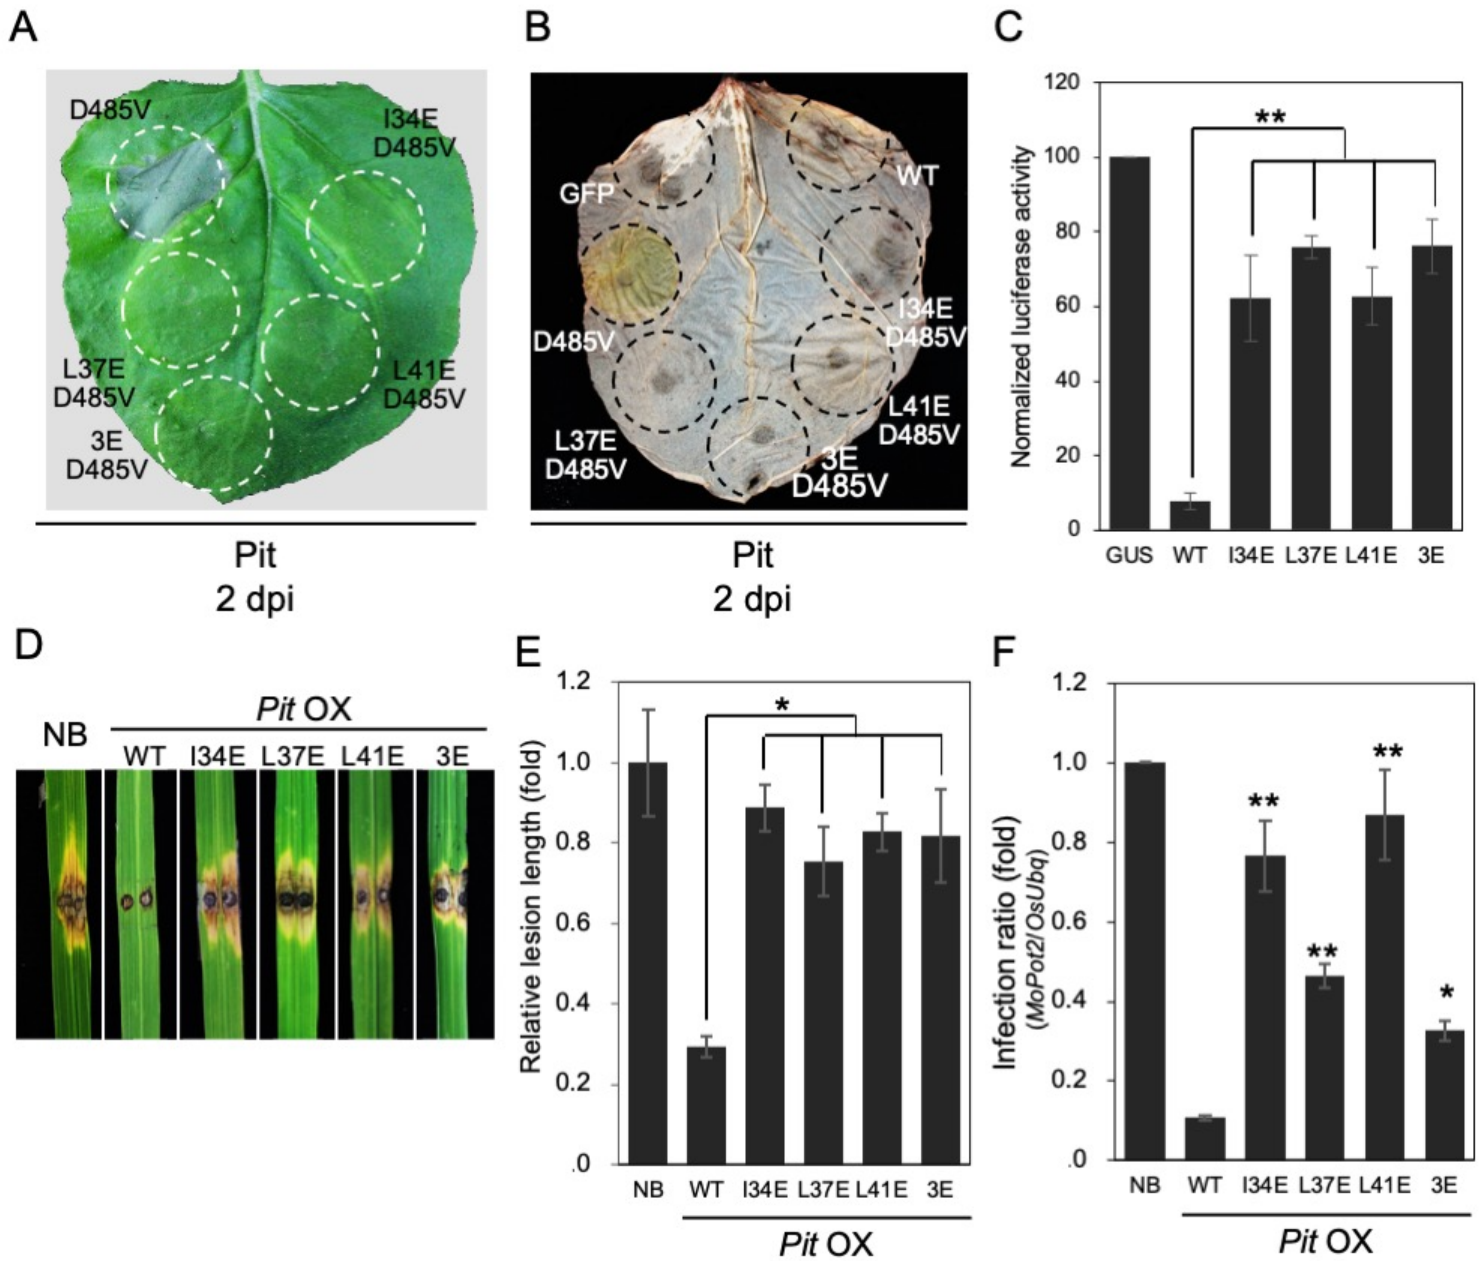

**Figure 3. Conserved hydrophobic residues in the Pit CC domain contribute to Pit-mediated immune signaling**  
**A**, Cell death phenotypes induced by transient expression of Pit mutants in *N. benthamiana*. Photos were taken at 2 dpi. The circles indicate the infiltrated regions. **B**, Effect of three hydrophobic residues on Pit D485V-induced ROS production in *N. benthamiana*. ROS production was examined by DAB staining at 2 dpi. **C**, Cell death activity of Pit mutants in rice protoplasts. Relative luciferase activity (GUS=100) is shown. Data are expressed as mean  $\pm$  standard error (SE) (\*\* $P < 0.01$ ,  $n = 3$ ). **D** and **E**, Responses, in plants overexpressing Pit WT or mutants, to infection with the incompatible *M. oryzae* race 007.0. **D**, Photograph shows typical phenotypes of transgenic and WT plants at 7 dpi. **E**, Statistical analysis of lesion length was performed at 6 dpi. Relative lesion length [Nippobnare (NB) = 1] is shown. Data are expressed as mean  $\pm$  standard error (SE) (\* $P < 0.05$ ;  $n \geq 30$ ). **F**, Growth of the incompatible *M. oryzae* race in Nipponbare wild-type plants and transgenic plants overexpressing Pit WT or mutants. Relative infection ratio (NB = 1) is shown. Data are expressed as mean  $\pm$  standard error (SE) (\* $P < 0.05$ ; \*\* $P < 0.01$ ;  $n = 10$ ).

Wang et al., Figure 4

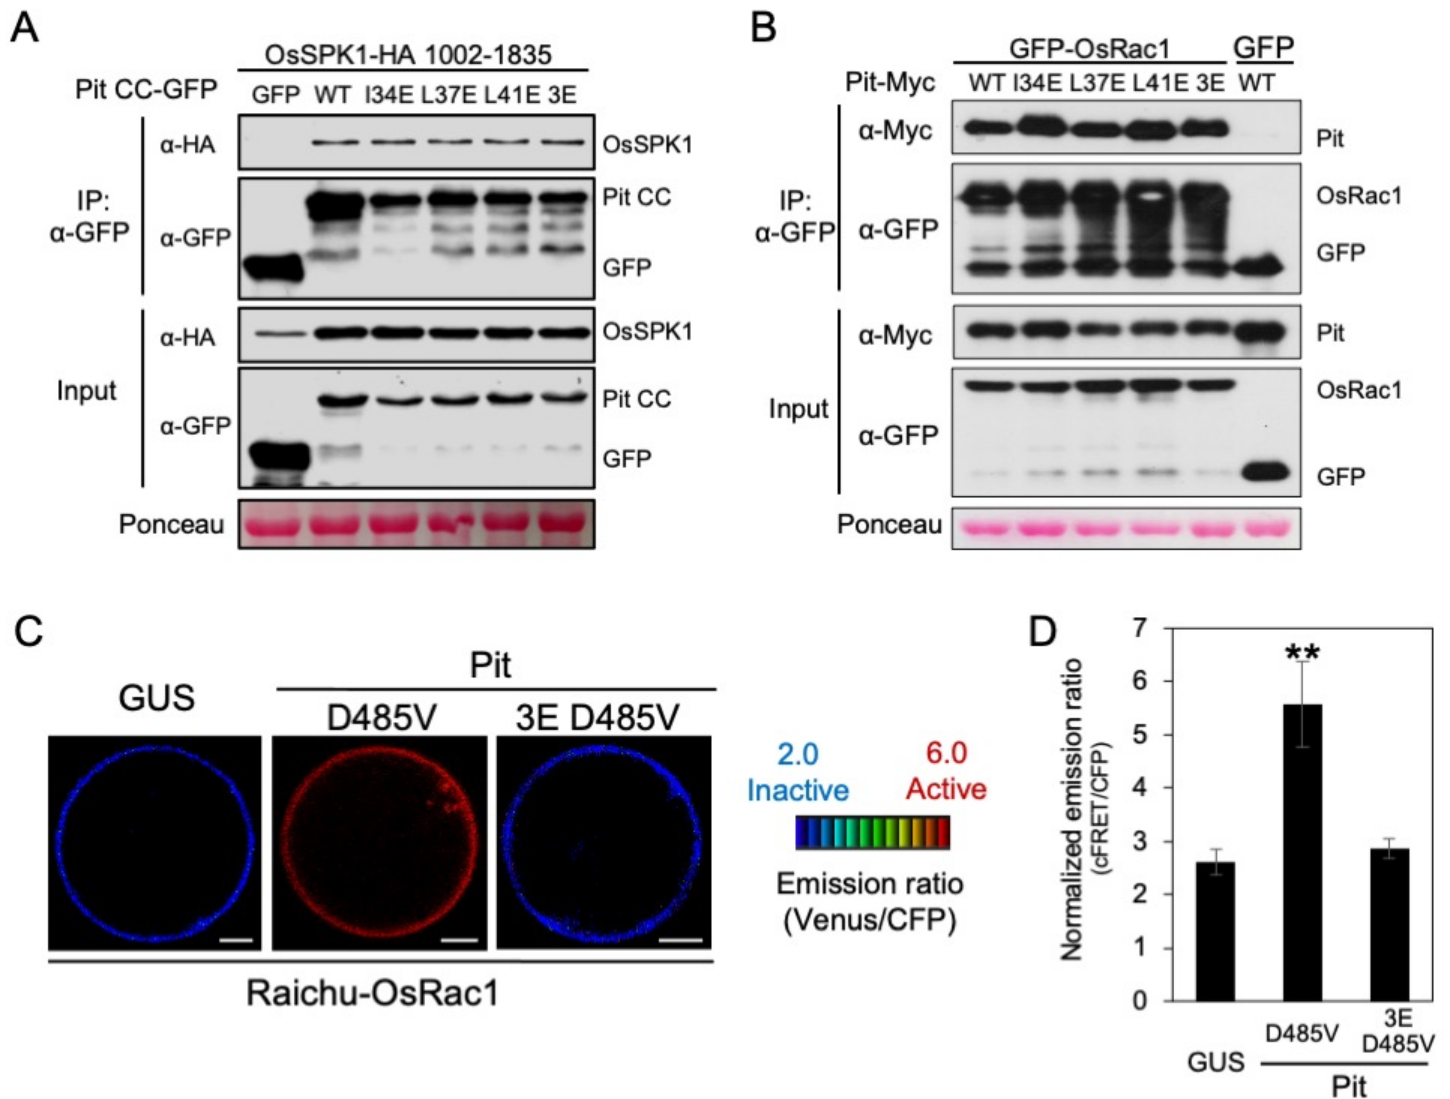

**Figure 4. Mutations in three hydrophobic residues do not affect binding to OsSPK1 or OsRac1 but perturb Pit-mediated OsRac1 activation**

**A**, Co-IP to test the interaction between OsSPK1 and Pit hydrophobic residue mutants in *N. benthamiana*. Total protein extract was immunoprecipitated with anti-GFP antibody, and western blotting was then carried out with anti-GFP and anti-HA antibodies. The post-transfer membrane was stained with Ponceau S. **B**, Co-IP to test the interaction between OsRac1 and Pit hydrophobic residue mutants in *N. benthamiana*. Total protein extract was immunoprecipitated with anti-GFP antibody, and western blotting was then carried out with anti-GFP and anti-Myc antibodies. The post-transfer membrane was stained with Ponceau S. **C** and **D**, *In vivo* OsRac1 activation by Pit hydrophobic residues mutants. **C**, Emission ratio images of confocal laser-scanning micrographs of rice protoplasts coexpressing Raichu-OsRac1 and the indicated Pit mutants, or negative control GUS. Scale bars, 5 μm. **D**, Quantification of normalized emission ratios of Venus to CFP. Data are expressed as mean ± standard error (SE) (\*\* $P < 0.01$ ,  $n = 60$ ).



Wang et al., Figure 5

A

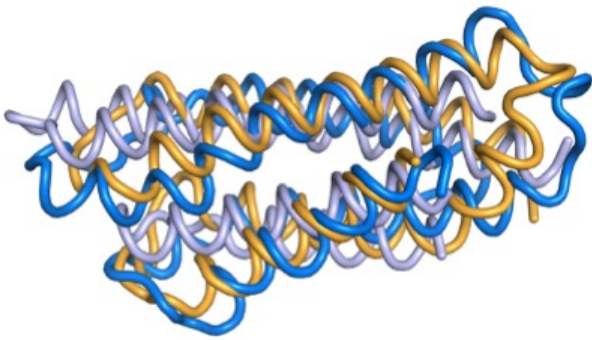

Blue: Sr33 CC  
 Light blue: Rx CC  
 Orange: Inactivated ZAR1 (Residues 1–113)

B

Inactivated Pit CC model  
 (Residues 1–115)

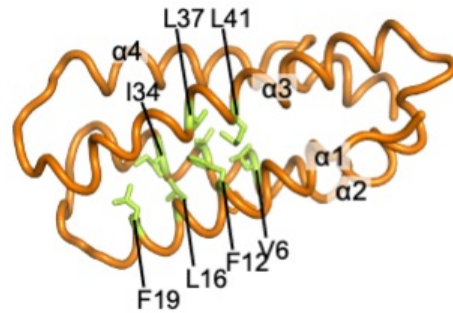

Inactivated ZAR1 CC  
 (Residues 1–113)

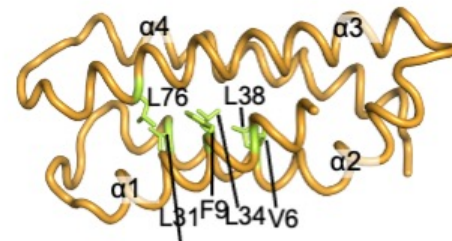

Sr33 CC

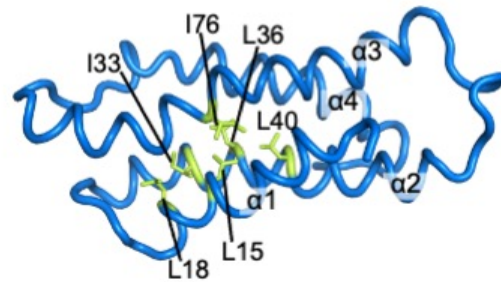

Rx CC

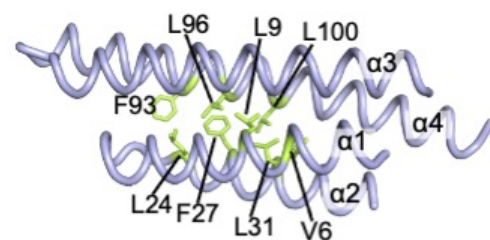

C

Inactivated Pit model

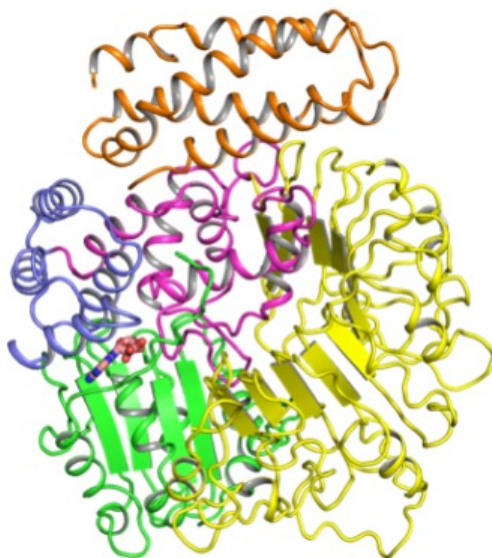

Orange: CC domain  
 Green: NBD  
 Blue: HD1  
 Pink: WHD  
 Yellow: LRR domain

**Figure 5. The CC domain of various NLRs**

**A**, The main chains of the CC domain structure of Sr33 (blue, solution NMR condition, Protein Data Bank ID code 2NCG), Rx (light blue, crystal condition, Protein Data Bank ID code 4M70), and inactivated ZAR1 (orange, electron microscopy condition, 6J5W, residues 1–113) were superimposed using PyMOL. **B**, Comparison of conserved hydrophobic residues of Pit (residues 1–115), inactivated ZAR1 (residues 1–113), Sr33, and Rx. The side chains of three key hydrophobic residues in Pit (I34, L37, and L41) and equivalent residues in inactivated ZAR1 1–113 (L31, L34, and L38), Rx (I33, L36, and L40), Sr33 (L24, F27, and L31), as well as the side chains of amino acids thought to be involved in hydrophobic interactions with these three residues, are shown in stick representation. **C**, Model structure and domain composition of full-length Pit, based on inactivated ZAR1 (Protein Data Bank ID code 6J5W), shows the monomeric state. The figure was drawn using PyMOL.



Wang et al., Figure 6

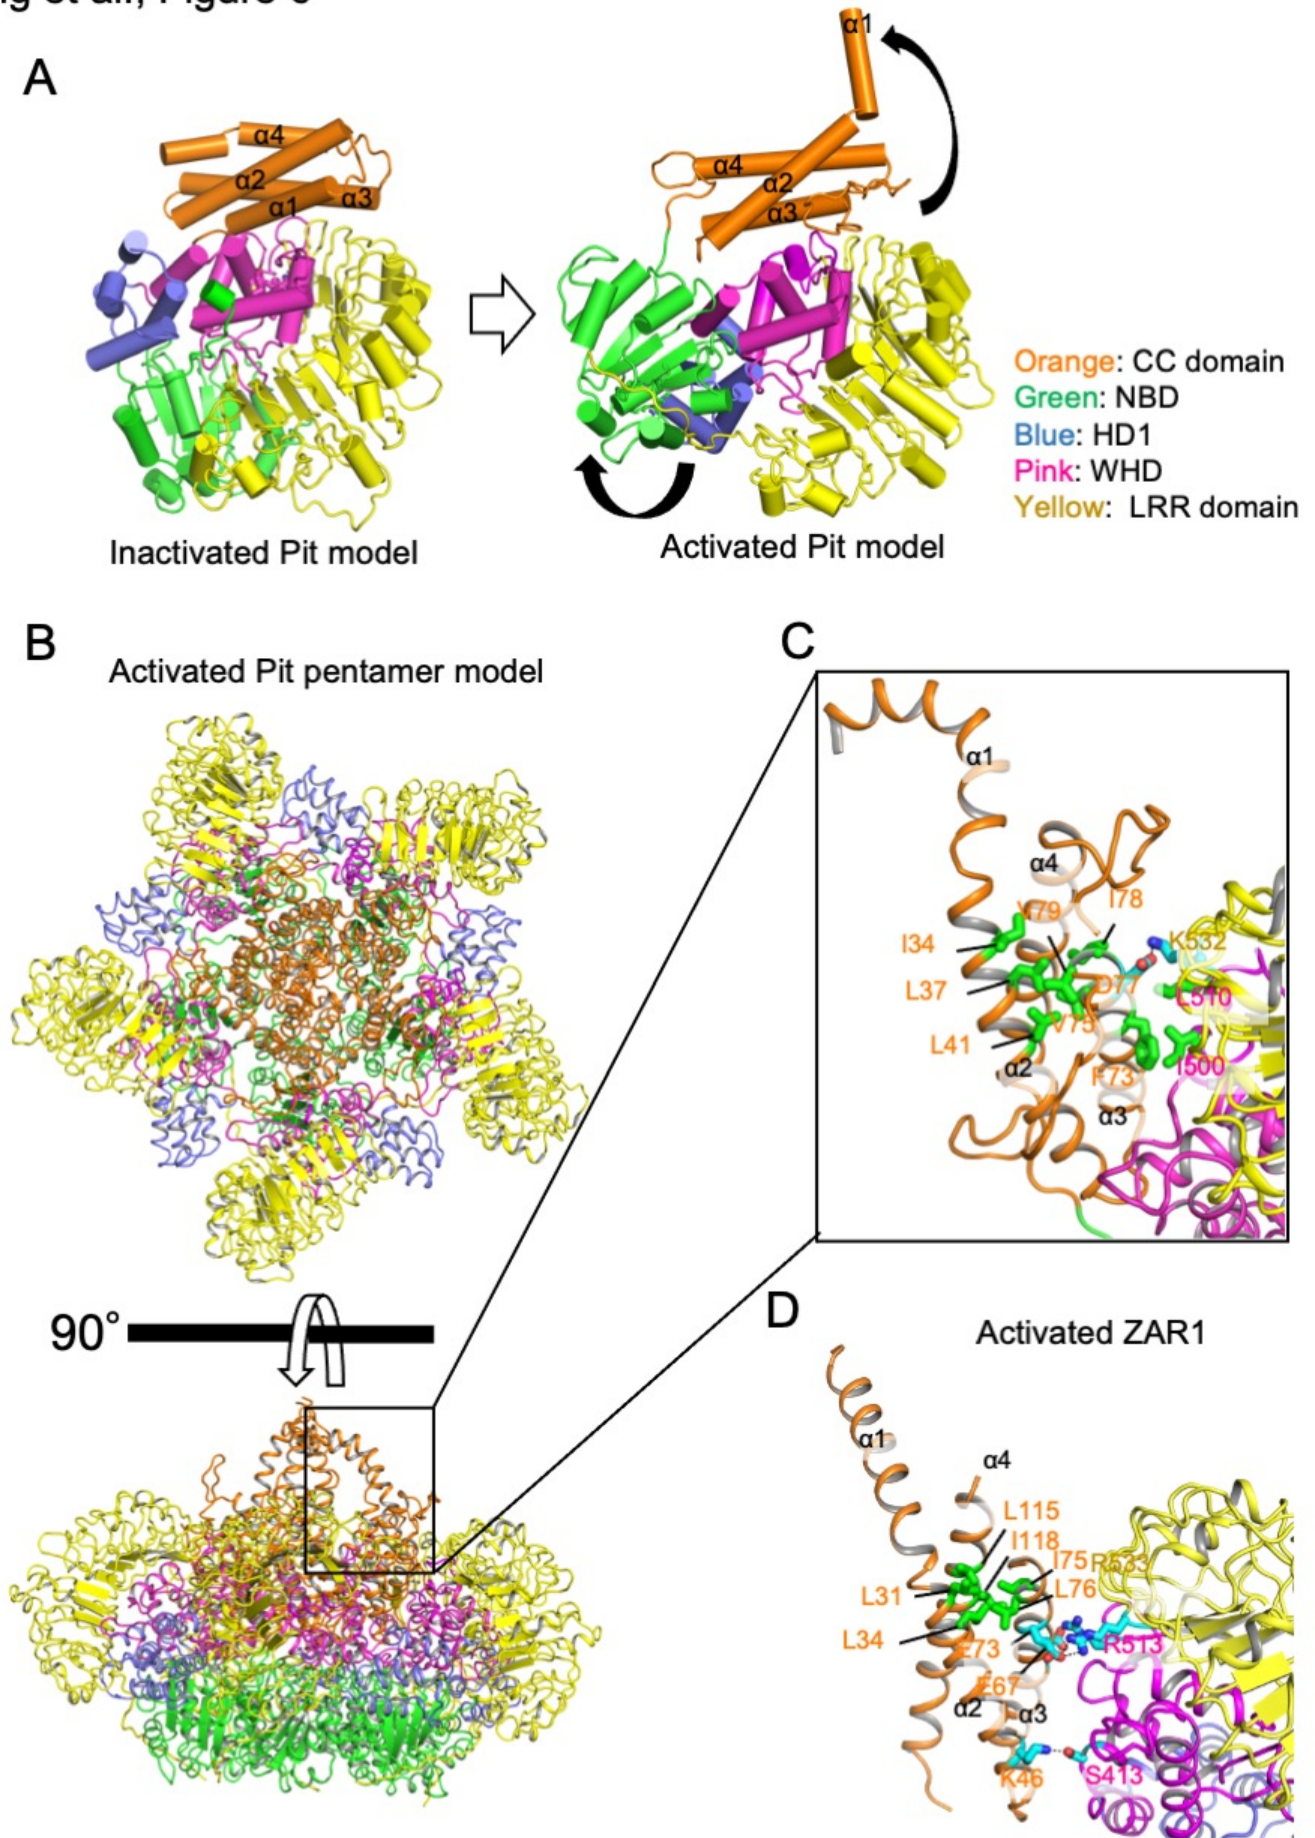

**Figure 6. Homology modeling of Pit using activated ZAR1 as a template**

**A**, Comparison of the inactivated and activated Pit model structures. The model structures of inactivated and activated Pit are based on the structures of inactivated ZAR1 (Protein Data Bank ID code 6J5W) and activated ZAR1 (Protein Data Bank ID code 6J5T). Conformational changes (black arrows) between the activated and inactivated forms of Pit occur around the hinge linking the HD domain (blue) and WHD domain (pink) of Pit and also at the  $\alpha 1$  helix of the CC domain (orange). **B**, Model structure of the activated Pit pentamer. The extreme N-terminal  $\alpha 1$  helix of the Pit pentamer may be required for the plasma membrane association of Pit. The CC, NBD, HD1, WHD, and LRR domains are shown in orange, green, blue, pink, and yellow, respectively. **C**, Hydrophobic interactions among  $\alpha 2$  (I34, L37, and L41),  $\alpha 3$  (F73, V75, I78, and V79), and WHD domain (I500 and L510) in the activated Pit pentamer model structure are shown. Residues that may be important for hydrophobic interactions in Pit function are shown in green, and hydrogen-bonded side chains are shown in light blue. **D**, Comparison of the interaction around  $\alpha 1$  of the activated ZAR1 structure (Protein Data Bank ID code 6J5T) and the active Pit oligomer model structure. Residues involved in hydrophobic interaction around  $\alpha 1$  are shown in green, and hydrogen-bonded side chains are shown in light blue. The figure was drawn using PyMOL.



## Wang et al., Figure 7

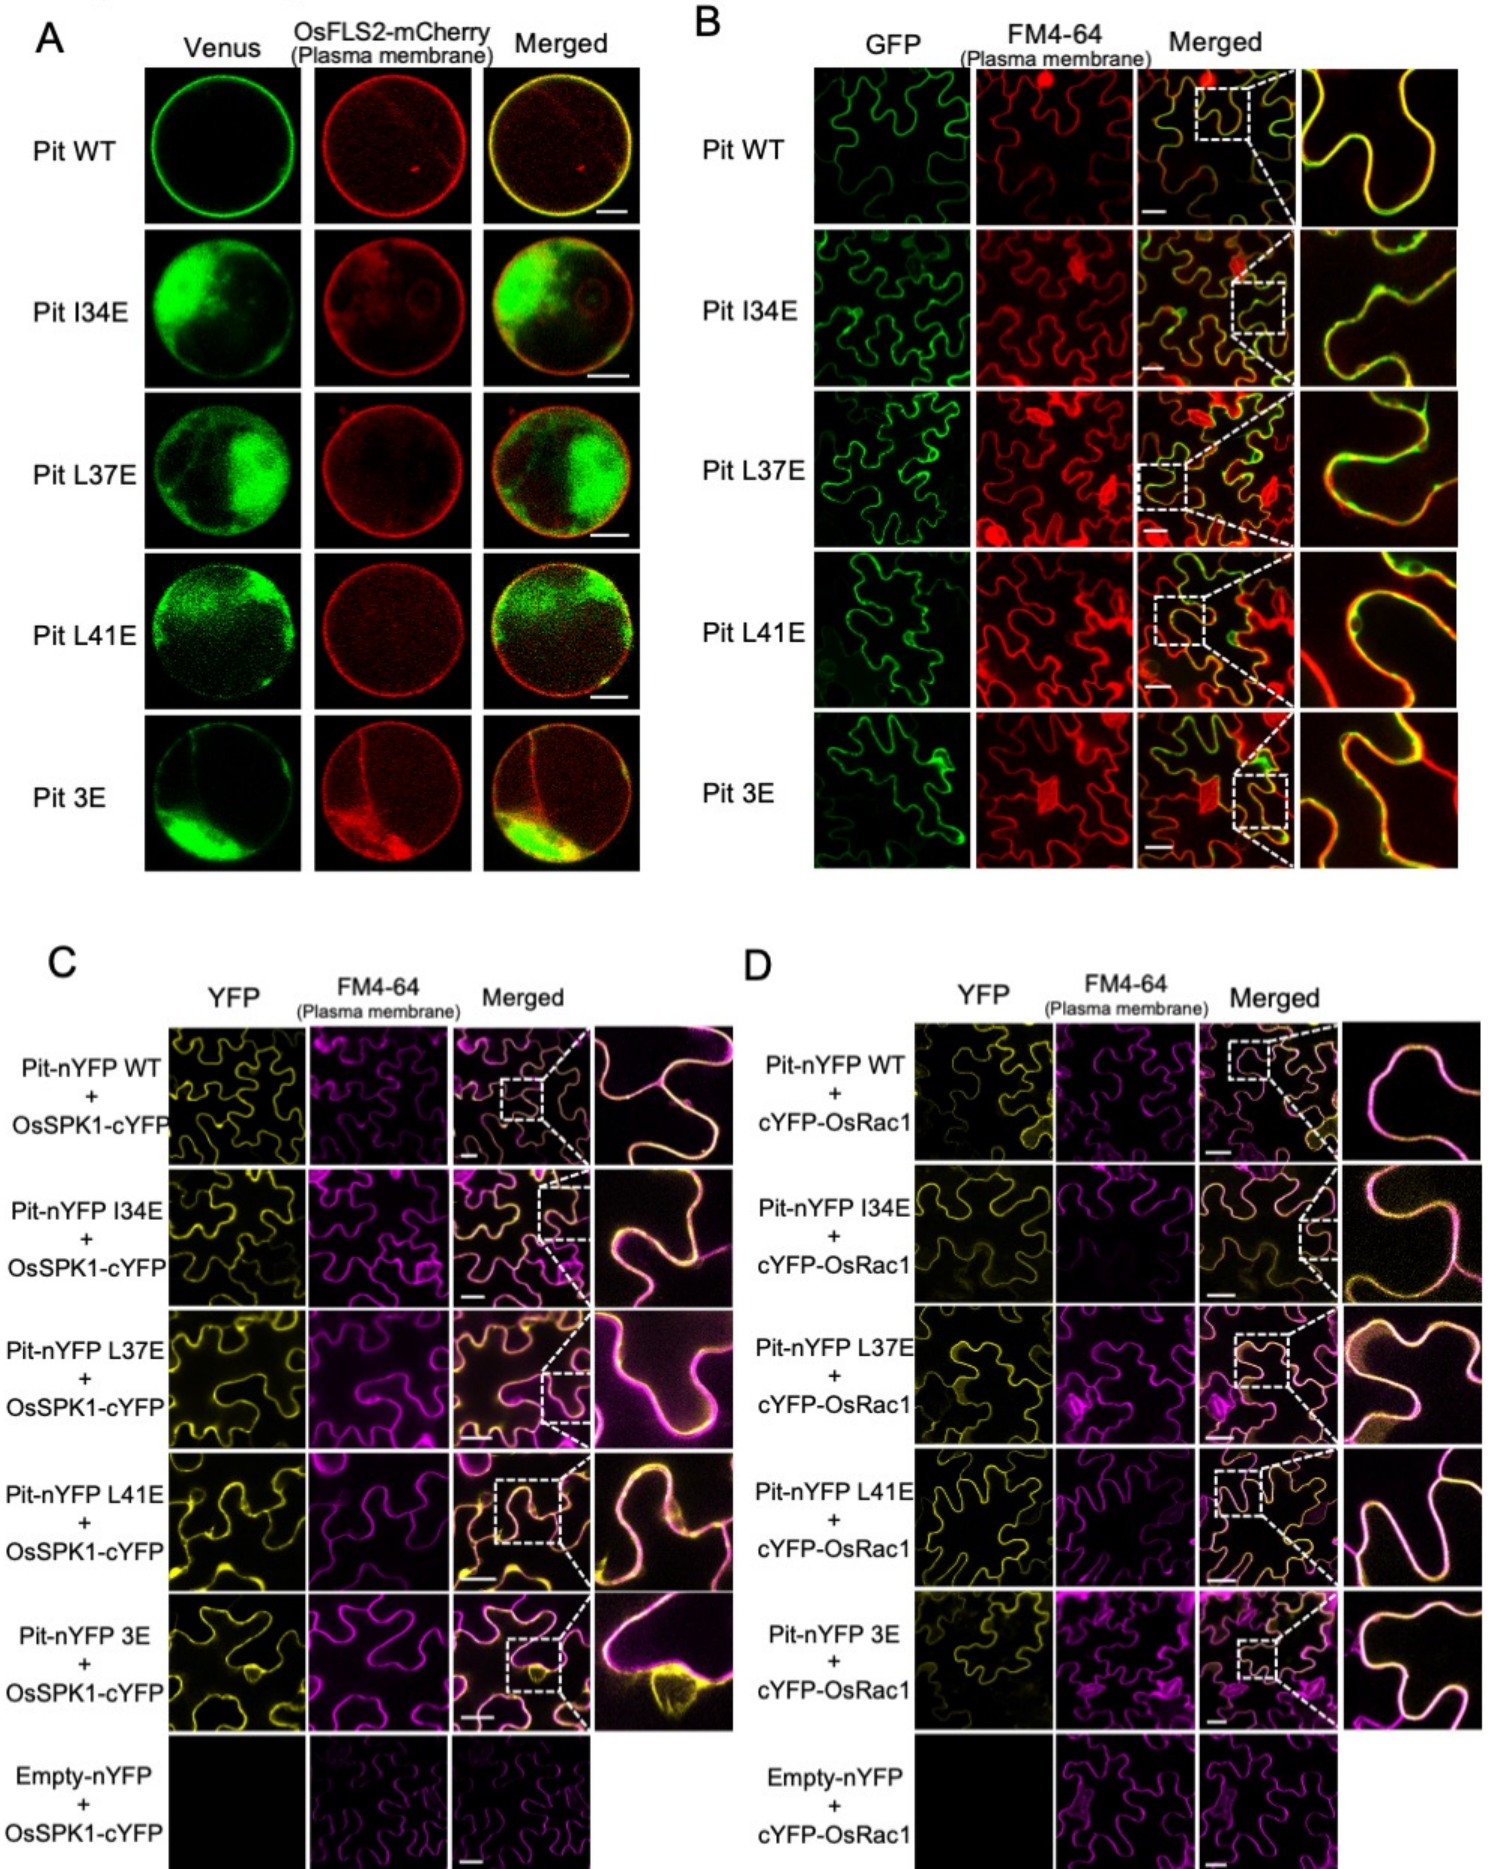

**Figure 7. Mutations in the conserved hydrophobic residues of Pit influence its plasma membrane localization**

**A** and **B**, Subcellular localization of Pit mutants in rice protoplasts and *N. benthamiana* leaves. **A**, Rice protoplasts were cotransfected with the indicated *Pit*-Venus mutants and *OsFLS2*-mCherry. Scale bars, 5  $\mu$ m. **B**, Tobacco leaves were injected with *Agrobacterium* carrying *Pit*-GFP mutants (green) and stained with FM4-64 (red: plasma membrane marker). Enlarged images of the boxed areas are shown in the right panels. Scale bars, 25  $\mu$ m. **C** and **D**, BiFC to detect interactions between Pit hydrophobic residue mutants and OsSPK1 (**C**) or OsRac1 (**D**). Expression constructs were transiently expressed in *N. benthamiana* after agroinfiltration. Empty vector served as a negative control. FM4-64 was used as a plasma membrane marker. Images were captured at 45 h post-infiltration. Enlarged images of the boxed areas in (**C**) are shown in the right panels. Scale bars, 25  $\mu$ m.



# Wang et al., Figure S1

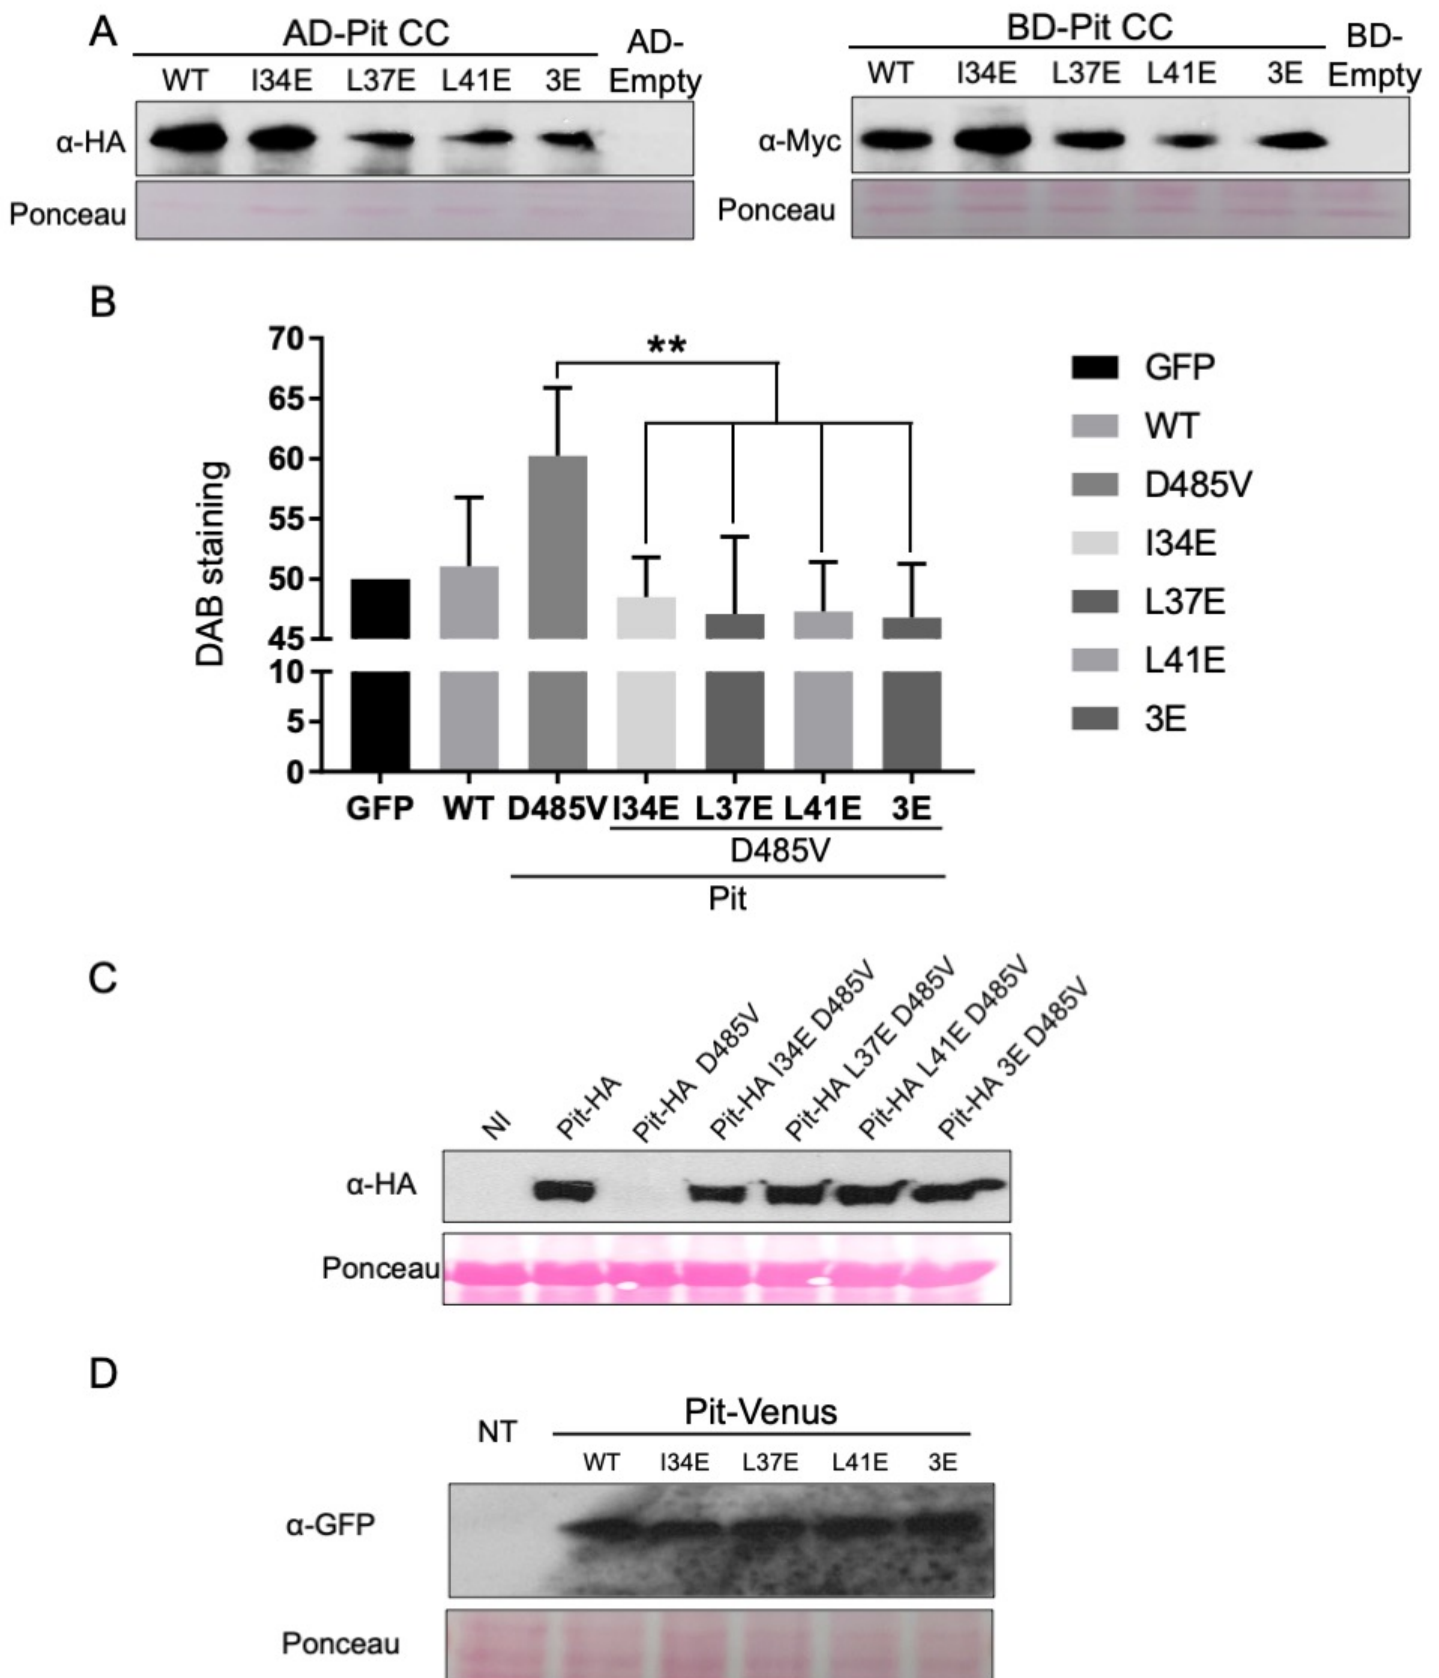

**Figure S1. Effect of conserved hydrophobic residue mutations on Pit signaling**

**A**, Protein expression of Pit CC WT and mutants in Y2HGold yeast cells. Anti-HA and anti-Myc antibodies were used for western blot to detect baits and preys, respectively. The post-transfer membrane was stained with Ponceau S. **B**, Quantitative analysis of the effect of I34, L37, and L41 mutation on Pit D485V-induced ROS production in *N. benthamiana*. Bars indicate DAB staining intensity relative to that observed after infiltration with negative control GFP. Data are expressed as mean  $\pm$  standard error (SE) (\*\*:  $P < 0.01$ ;  $n = 10$ ). Relative intensity of DAB staining (GUS=50) is shown. **C**, HA-tagged Pit mutants were transiently expressed in *N. benthamiana* leaves. After 2 days, the total proteins of infiltrated leaves were extracted for immunoblotting with anti-HA antibody. NI indicates non-infiltrated leaves. The post-transfer membrane was stained with Ponceau S and used as an internal control. **D**, Venus-tagged Pit mutants were transiently expressed in rice protoplasts. After 14 h, total protein was extracted with SDS loading buffer, and western blotting was then carried out with anti-GFP antibody. NT indicates a non-transformed sample. The post-transfer membrane was stained with Ponceau S.



Wang et al., Figure S2

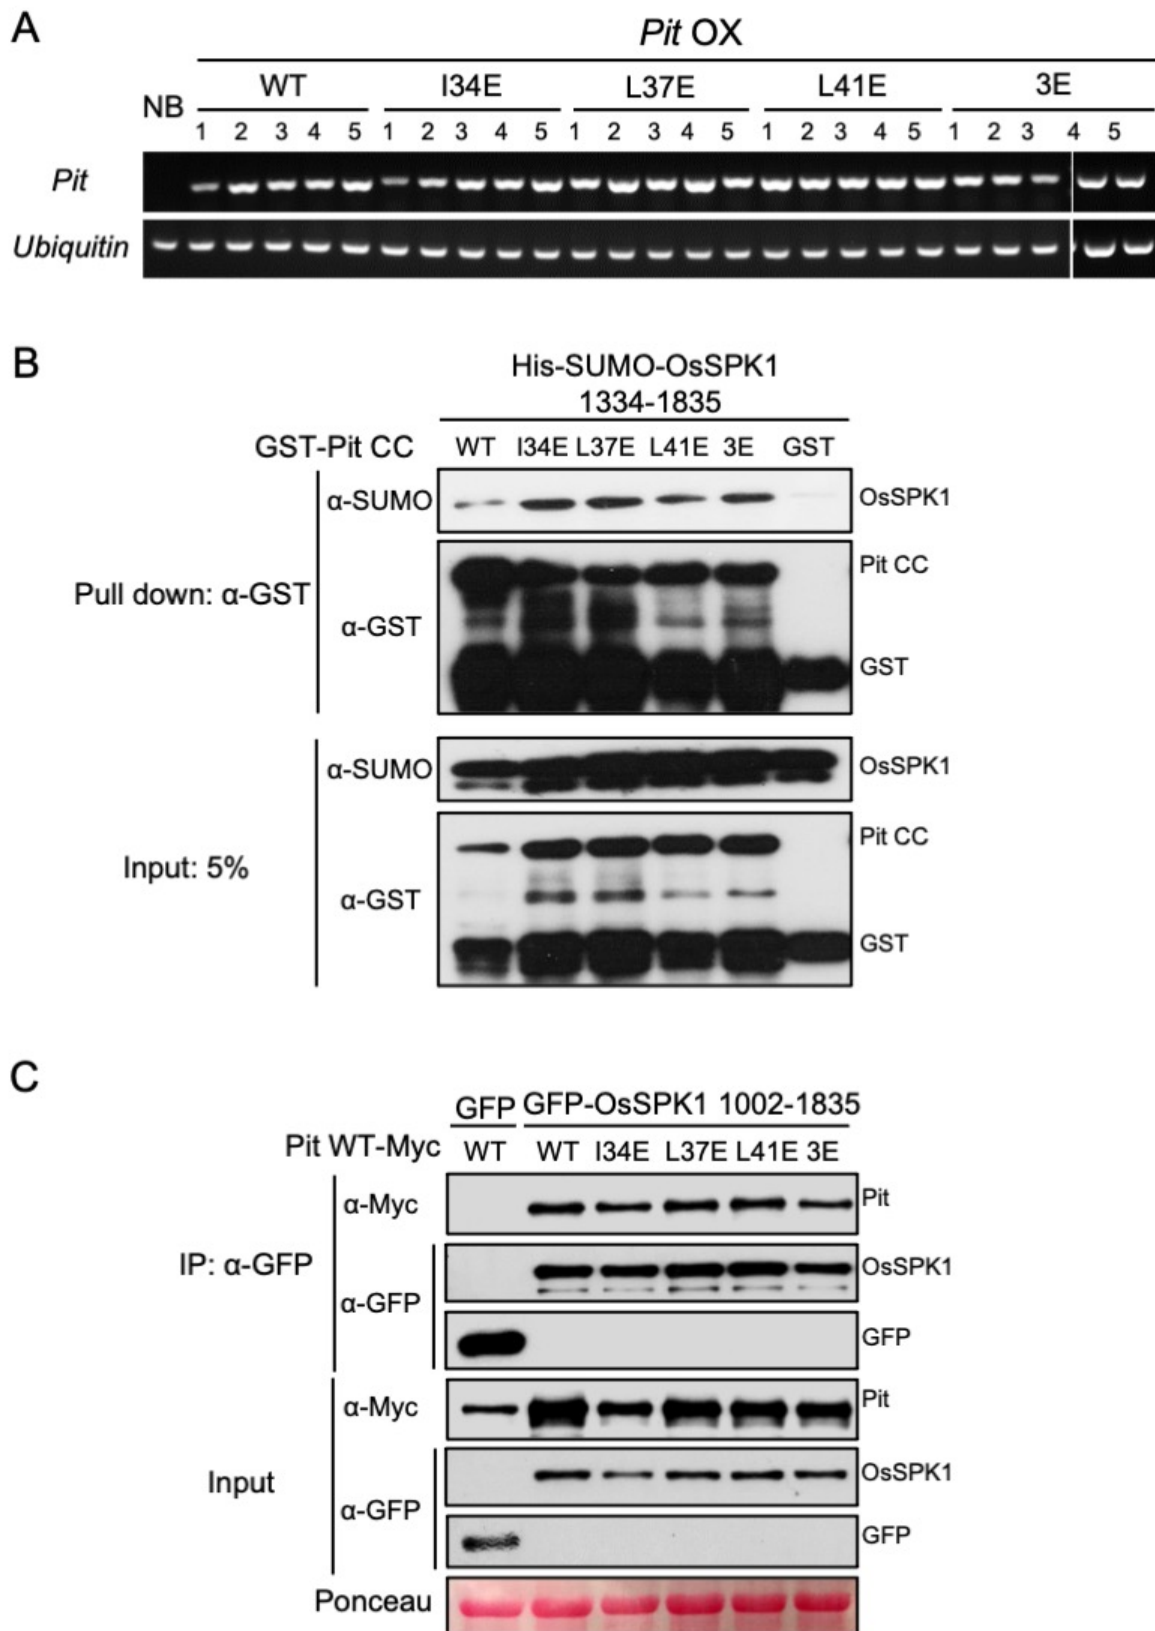

**Figure S2. Three hydrophobic residues in the Pit CC domain are not necessary for binding to OsSPK1**

**A**, Transcript levels of exogenous *Pit* WT and *Pit* mutants were measured by RT-PCR. Numbers indicate independent transgenic lines. *Ubiquitin* was used as an internal control. **B**, *In vitro* binding assay between Pit CC mutants and OsSPK1. Purified GST or GST-tagged Pit CC mutants immobilized on Sepharose were incubated with His-SUMO-tagged OsSPK1 (amino acids 1334–1835). After washing, the bound proteins were eluted by addition of SDS loading buffer. Anti-GST and anti-SUMO antibodies were used for subsequent western blotting analysis. **C**, Co-IP to analyze the interaction in *N. benthamiana* between OsSPK1 (amino acids 1002–1835) and full-length Pit with mutations in three conserved hydrophobic residues. Total protein extract was immunoprecipitated with anti-GFP antibody, and western blotting was then carried out with anti-GFP and anti-Myc antibodies. The post-transfer membrane was stained with Ponceau S.

## Wang et al., Table S1

| <b>Primers for this study</b>  |                                                         |
|--------------------------------|---------------------------------------------------------|
| <b>Primer name</b>             | <b>Sequence (5'-3')</b>                                 |
| MgPot2-F                       | ACGACCCGTCTTTACTTATTTGG                                 |
| MgPot2-R                       | AAGTAGCGTTGGTTTTGTTGGAT                                 |
| UBQ-F                          | AACCAGCTGAGGCCCAAGA                                     |
| UBQ-R                          | ACGATTGATTTAACCAGTCCATGA                                |
| PAL1-F                         | TGAATAACAGTGGAGTGTGGAG                                  |
| PAL1-R                         | AACCTGCCACTCGTACCAAG                                    |
| PBZ1-F                         | GGTGTGGGAAGCACATACAA                                    |
| PBZ1-R                         | GTCTCCGTCGAGTGTGACTTG                                   |
| <b>Primers for RT-PCR</b>      |                                                         |
| <b>Primer name</b>             | <b>Sequence (5'-3')</b>                                 |
| Pit OX-F                       | CTGCACTTTGAATACCATTGGC                                  |
| Pit OX-R                       | GGAGAATTTCCAATCTCTGTAATCTAA                             |
| Ubiquitin-F                    | CCAGGACAAGATGATCTGCC                                    |
| Ubiquitin-R                    | AAGAAGCTGAAGCATCCAGC                                    |
| <b>Primers for mutagenesis</b> |                                                         |
| <b>Primer name</b>             | <b>Sequence (5'-3')</b>                                 |
| Pit I34E-R                     | TCTTCAGGCTCTCCTCACCCCTTTTCACACTTAATG                    |
| Pit L37E-F                     | GTATTGAGAGCGAGAAGAAAAATCTGGAATTC                        |
| Pit L37E-R                     | AGATTTTTCTTCTCGCTCTCAATACCCCTTTTC                       |
| Pit L41E-F                     | AGCCTGAAGAAAAATGAGGAATTCCTCAACGCTG                      |
| Pit L41E-R                     | AGCGTTGAAGAATTCCTCATTTTTCTTCAGGCTCTC                    |
| Pit 3E-F                       | TGAAAAGGGGTGAGGAGAGCGAGAAGAAAAATGAGGAATTCCTCAACGCTGTTTC |
| Pit 3E-R                       | TGAAGAATTCCTCATTTTTCTTCTCGCTCTCCTCACCCCTTTTCACACTTAATG  |
